# Supplementary material for: Engineering new balancer chromosomes in C. elegans via CRISPR/Cas9
Source: PubMed Central journal article supplement (PMC5030659; doi:10.1038/srep33840), 2016-09-21
Supplement: srep33840-s1.pdf [file srep33840-s1.pdf]

1 **Supplementary Information (Iwata et al.)**

2

3 **Engineering new balancer chromosomes in *C. elegans* via CRISPR/Cas9**

4

5 Satoru Iwata<sup>1</sup>, Sawako Yoshina<sup>1</sup>, Yuji Suehiro<sup>1</sup>, Sayaka Hori<sup>1</sup>, Shohei Mitani<sup>1,2,#</sup>

6 <sup>1</sup>Department of Physiology, Tokyo Women's Medical University School of Medicine,

7 Tokyo, Japan

8 <sup>2</sup>Tokyo Women's Medical University Institute for Integrated Medical Sciences

9 <sup>#</sup>To whom correspondence should be addressed.

10

11 **Supplementary Fig. 1: Map of *C. elegans* genome coverage by available balancers**

12 **and rearrangements.** Chromosomal regions shown by grey boxes are covered by

13 genetic rearrangements such as translocations, inversions and crossover-suppressors

14 from previous studies. The black boxes represent uncovered regions. Balancers

15 generated in this study are indicated as red boxes. Abbreviations: *T* (translocation), *In*

16 (inversion), and *C* (crossover-suppressor).

17

18 **Supplementary Fig. 2: Schematic design for creating genome rearrangements by**

19 **using the CRISPR/Cas9 system.** Expressed Cas9 induces DSBs on a chromosome at

20 locations determined by the two sgRNAs. The DSBs are repaired using HR with the

21 targeting vectors or by other mechanisms, leading to genomic rearrangements. a

22 (yellow), b (green), c (striped pattern), d (blue), and e (orange) boxes are used to show

1 how chromosomal regions are cut and joined.

2

3 **Supplementary Fig. 3: Chromosomal inversion *tmIn2* between *ced-2* and *unc-17***

4 **induced by the CRISPR/Cas9 system. (a)** Schematic of the genetic rearrangement

5 *tmIn2*. *tmIn2* resulted from an inversion between *ced-2* and *unc-17*. **(b)** PCR

6 amplification of the breakpoint junctions in wild-type (WT) and *tmIn2* animals. **(c)**

7 Breakpoint sequence alignments for the WT, targeting vector and *tmIn2* alleles. Black

8 bars indicate the predicted cleavage sites.

9

10 **Supplementary Fig. 4: Chromosomal inversion *tmIn3* between *jtr-1* and *unc-17***

11 **induced by the CRISPR/Cas9 system. (a)** Schematic of the genetic rearrangement

12 *tmIn3*. *tmIn3* resulted from an inversion between *jtr-1* and *unc-17*. **(b)** PCR

13 amplification of the breakpoint junctions in WT and *tmIn3* animals. **(c)** Breakpoint

14 sequence alignments for the WT, targeting vector and *tmIn3* alleles. Black bars indicate

15 the predicted cleavage sites.

16

17 **Supplementary Fig. 5: Chromosomal inversion *tmIn3* can balance a lethal**

18 **mutation. (a)** An overview of the animal crossing schemes used to test whether *tmIn3*

19 could balance a *lin-1* mutation. **(b)** The *lin-1/tmIn3* worms were phenotypically normal.

20 **(c)** Genotyping of 16 animals was performed to confirm the heterozygosity of *lin-1* and

21 the balancer *tmIn3*. **(d)** The *lin-1/lin-1* worms had a lethal phenotype. **(e)** Genotyping of

22 16 animals confirming the homozygosity of *lin-1* and the absence of the balancer *tmIn3*.

1 (f) The *tmIn3/tmIn3* worms showed a larval arrest phenotype. (g) Genotyping of 16  
2 animals confirming the presence of *lin-1(+/+)* and the absence of wild-type *jtr-1* and  
3 *unc-17*. Scale bars represent 100  $\mu$ m.

4

5 **Supplementary Fig. 6: Structural variants detected by split read and copy number**

6 **analysis.** (a) According to the realignment, clipped reads were classified into 5 types  
7 (middle panel), and candidate regions of structural variants were identified by a  
8 combination of the classified reads (lower panel). (b) Low and high copy number  
9 regions were determined according to the ratio of normalized depth between sample and  
10 control data. (c) Finally, the deleted and multiplied regions were selected by testing  
11 whether the candidate region corresponded to low and high copy regions, respectively.

12

13 **Supplementary Fig. 7: Chromosomal inversion *tmIn4* between *lin-8* and *dpy-2***

14 **induced by the CRISPR/Cas9 system.** (a) Schematic of the genetic rearrangement  
15 *tmIn4*. *tmIn4* resulted from an inversion between *lin-8* and *dpy-2*. (b) PCR amplification  
16 of the breakpoint junctions in WT and *tmIn4* animals. (c) Breakpoint sequence  
17 alignments of WT, targeting vector and *tmIn4*. Black bars indicate the predicted  
18 cleavage sites. (d) The relative position of breakpoints on chromosomal balancer II. The  
19 generated balancer is indicated by red double-headed arrows. Failures in the isolation of  
20 inversions are shown by white arrows with cross marks. (e) *tmIn4* animals exhibited a  
21 recessive dumpy (Dpy) phenotype. Scale bars represent 100  $\mu$ m.

22

1 **Supplementary Fig. 8: Usage of chromosomal inversion *tmIn4* to balance a lethal**  
2 **mutation.** (a) Phenotypes and genotypes resulting from the self-fertilization of  
3 *mlt-7/tmIn4* heterozygotes. The *mlt-7/tmIn4* worms were phenotypically normal. (b)  
4 Genotyping of 16 animals was performed to determine the presence of the *mlt-7*  
5 heterozygote and the balancer *tmIn4* heterozygote. (c) The *mlt-7/mlt-7* worms had a  
6 lethal phenotype. (d) Genotyping of 16 animals was performed to determine the  
7 presence of the *mlt-7* homozygous deletion and the absence of the balancer *tmIn4*. (e)  
8 The *tmIn4/tmIn4* worms exhibited the dumpy (Dpy) phenotype. (f) Genotyping of 16  
9 animals was performed to determine the presence of *mlt-7(+/+)* and the absence of *lin-8*  
10 and *dpy-2*. Scale bars represent 100  $\mu$ m.

11  
12 **Supplementary Fig. 9: Chromosomal translocation *tmT3* between *pal-1(III)* and**  
13 ***unc-17(IV)* induced by the CRISPR/Cas9 system.** (a) Schematic of the genetic  
14 rearrangement *tmT3*. *tmT3* resulted from a translocation between *pal-1(III)* and  
15 *unc-17(IV)*. (b) PCR detection of the breakpoint junctions in wild-type (WT) and *tmT3*  
16 animals. (c) Breakpoint sequence alignments of WT, targeting vector and *tmT3*. Black  
17 bars indicate the predicted cleavage sites. (d) Summary of experimental efficiencies to  
18 generate the chromosomal translocation.

19  
20 **Supplementary Fig. 10: Experimental methods to generate multi-copy integration**  
21 **strains.** (a) Schematic design showing how integrated strains were engineered with the  
22 CRISPR/Cas9 system. P<sub>0</sub> *tmC1;tmEx4487[dpy-3, Pmyo-2::Venus, Punc-18::unc-18]*

1 worms were co-injected with a Cas9/sgRNA dual expression vector and a DsRed  
2 transgene marker. Fluorescent F<sub>3</sub> dumpy (Dpy) progeny carrying the balancer  
3 chromosome contained the dominant marker *Pmyo-2::Venus*. **(b)** PCR of the breakpoint  
4 junctions in WT and the integration strains. **(c)** Images of Venus localization in the  
5 *Pmyo-2::Venus* integrated strains. Images of *tmC1[tmIs1171]* and *tmC1[tmIs1172]*  
6 animals are shown by DIC and fluorescence microscopy. Scale bars represent 100 μm.  
7 **(d)** Summary of the integration efficiency to generate the integrated strain.

8  
9  
10 **Supplementary Figure 11: Breakpoint sequence alignments for the WT and**  
11 ***tmIn42-44* alleles.** Red triangles indicate cleavage sites. Sequences around breakpoints  
12 are shown by blue letters for *unc-17* and magenta letters for *egl-4*. Insertion sequences  
13 are shown by black letters. Black bars indicate the predicted cleavage sites.

**Supplementary Table 1: Comparison of sequence coverage between N2 (Control) and *tm5929/tmIn3***

| <b>Sample</b>       | <b>Read length (bp)</b> | <b>Coverage</b> | <b>Mapped region (%)</b> |
|---------------------|-------------------------|-----------------|--------------------------|
| N2 (Control)        | 153.18                  | 56.94           | 99.91                    |
| <i>tm5929/tmIn3</i> | 141.72                  | 39.57           | 99.88                    |

**Supplementary Table 2: Summary of experimental efficiencies to generate the genetic balancer II**

| Balancer name | Cas9 targets        | Distance (cM) | Background genotype  | P <sub>0</sub> worms <sup>a</sup> | F <sub>1</sub> worms <sup>b</sup> | Phenotype in F <sub>2</sub> <sup>c</sup> | F <sub>1</sub> PCR <sup>d</sup> | F <sub>2</sub> PCR <sup>e</sup> | Ratio (%) <sup>f</sup> |
|---------------|---------------------|---------------|----------------------|-----------------------------------|-----------------------------------|------------------------------------------|---------------------------------|---------------------------------|------------------------|
| -             | <i>emc-1 lin-31</i> | 9.6           | <i>lig-4 (tm750)</i> | 41                                | 94                                | 35                                       | 10                              | 0                               | 0                      |
| -             | <i>sup-9 lin-31</i> | 6.3           | <i>lig-4 (tm750)</i> | 39                                | 214                               | 35                                       | 16                              | 0                               | 0                      |
| -             | <i>sqv-2 dpy-2</i>  | 9.5           | <i>lig-4 (tm750)</i> | 73                                | 257                               | 80                                       | 2                               | 0                               | 0                      |
| <i>tmIn4</i>  | <i>lin-8 dpy-2</i>  | 8.6           | <i>lig-4 (tm750)</i> | 51                                | 267                               | 108                                      | 9                               | 1                               | 0.37                   |

<sup>a</sup>total number of injected P<sub>0</sub> worms, <sup>b</sup>total number of fluorescent F<sub>1</sub> worms obtained, <sup>c</sup>number of F<sub>1</sub> strains whose progeny showed phenotypes, <sup>d</sup>number of F<sub>1</sub> strains that showed rearrangement-specific PCR bands in the first screening, <sup>e</sup>number of F<sub>2</sub> strains that showed rearrangement-specific PCR bands in the second screening, <sup>f</sup>ratios of isolated genetic balancer strains over total number of fluorescent F<sub>1</sub> worms.

**Supplementary Table 3: Summary of experimental efficiencies to generate the genetic balancers X**

| Balancer name    | Cas9 targets                    | Distance (cM) | genotype             | P <sub>0</sub> worms | F <sub>1</sub> worms <sup>a</sup> | Phenotype in F <sub>2</sub> | F <sub>1</sub> PCR <sup>b</sup> | F <sub>2</sub> PCR <sup>c</sup> | Inversion interval (cM) | Ratio (%) <sup>d</sup> |
|------------------|---------------------------------|---------------|----------------------|----------------------|-----------------------------------|-----------------------------|---------------------------------|---------------------------------|-------------------------|------------------------|
| <i>tmIn26-27</i> | <i>lon-2</i><br><i>mec-10</i>   | 6.7           | <i>lig-4 (tm750)</i> | 49                   | 69                                | 43                          | 2                               | 2                               | 6.7                     | 4.3                    |
| <i>tmC1-2</i>    | <i>F53B1.2</i><br><i>unc-18</i> | 17            | <i>lig-4 (tm750)</i> | 27                   | 184                               | 46                          | 8                               | 2                               | 11.7                    | 1.1                    |

<sup>a</sup>total number of injected P<sub>0</sub> worms, <sup>b</sup>total number of fluorescent F<sub>1</sub> worms obtained, <sup>c</sup>number of F<sub>1</sub> strains whose progeny showed phenotypes, <sup>d</sup>number of F<sub>1</sub> strains that showed rearrangement-specific PCR bands in the first screening, <sup>e</sup>number of F<sub>2</sub> strains that showed rearrangement-specific PCR bands in the second screening, <sup>f</sup>ratios of isolated genetic balancer strains over total number of fluorescent F<sub>1</sub> worms.



**Supplementary Table 4: Summary of the break point sequence analysis**

| Rearrangement | left breakpoint    |           |                     | right breakpoint   |           |                     |
|---------------|--------------------|-----------|---------------------|--------------------|-----------|---------------------|
|               | left side deletion | insertion | right side deletion | left side deletion | insertion | right side deletion |
| <i>tmIn1</i>  | 3                  | 25        | (-)                 | 1                  | 24        | 1                   |
| <i>tmIn2</i>  | 3                  | 26        | 5                   | 1                  | 1         | 4                   |
| <i>tmIn3</i>  | 3                  | 0         | 1                   | 1                  | (-)       | 1                   |
| <i>tmIn4</i>  | 12                 | 21        | 1                   | (-)                | 18        | 1                   |
| <i>tmIn26</i> | (-)                | (-)       | (-)                 | (-)                | (-)       | (-)                 |
| <i>tmIn27</i> | 5                  | (-)       | 10                  | 55                 | (-)       | 6                   |
| <i>tmC1</i>   | (-)                | 25        | 1                   | (-)                | 6         | 1                   |
| <i>tmC2</i>   | 6                  | 33        | 18                  | 4                  | (-)       | 3                   |
| <i>tmT3</i>   | (-)                | (-)       | (-)                 | 751                | (-)       | 3                   |
| <i>tmIn42</i> | 3                  | 12        | 1                   | (-)                | 14        | 1                   |
| <i>tmIn43</i> | 5                  | (-)       | 1                   | 5                  | 1         | 1                   |
| <i>tmIn44</i> | 1                  | 43        | 1                   | (-)                | 36        | 1                   |
| <i>tmIn45</i> | (-)                | 33        | 2                   | 16                 | (-)       | 16                  |

The sequence identity or indel characteristics are shown for two break points of the genome for each rearrangement; left breakpoint and right breakpoint for all the rearrangements except *tmT3*, for which left breakpoint column means the junction of III; IV and right

breakpoint column means the junction of IV; III. Each breakpoint is divided to two parts: left side and right side from putative DSB sites. Identical sequences to targeting vectors (or original genome) are indicated by “complete copy”, whereas deletions are shown by ”del” with the length in the following parenthesis, and insertions shown by “ins” with the length in the following parenthesis.

**Supplementary Table 5: List of all primers used in this study**

**sgRNA primers**

|                     |                                                       |
|---------------------|-------------------------------------------------------|
| unc-17 (IV) sgRNA F | 5' -AGACTCGGAGATCCTCAAAGGTTTTAGAGCTAGAAATAGCAAGT-3'   |
| unc-17 (IV) sgRNA R | 5' -CTTTGAGGATCTCCGAGTCTCAAGACATCTCGCAATAGG-3'        |
| egl-4 (IV) sgRNA F  | 5' -ATTGTCGACGACTTCCGAGGTTTTAGAGCTAGAAATAGCAAGT-3'    |
| egl-4 (IV) sgRNA R  | 5' -CTCGGAAGTCGTCGACAATCAAGACATCTCGCAATAGG-3'         |
| ced-2 (IV) sgRNA F  | 5' -TCCAACGGAATGTACAAAGGTTTTAGAGCTAGAAATAGCAAGT-3'    |
| ced-2 (IV) sgRNA R  | 5' -CTTTGTACATTCCGTTGGACAAGACATCTCGCAATAGG-3'         |
| jtr-1 (IV) sgRNA F  | 5' -ACGGAACACGGCGGAACCACGTTTTAGAGCTAGAAATAGCAAGT-3'   |
| jtr-1 (IV) sgRNA R  | 5' -GTGGTTCCGCCGTGTTCCGTCAAGACATCTCGCAATAGG-3'        |
| csn-4 (IV) sgRNA F  | 5' -AACATGGAGAATCTATTCTGAAGTTTTAGAGCTAGAAATAGCAAGT-3' |
| csn-4 (IV) sgRNA R  | 5' -TTCAGAATAGATTCTCCATGTTCAAGACATCTCGCAATAGG-3'      |
| dpy-2 (II) sgRNA F  | 5' -GAAGTCCAGAGTCTCCTGAGTTTTAGAGCTAGAAATAGCAAGT-3'    |
| dpy-2 (II) sgRNA R  | 5' -TCAGGAGACTCTGGACTTCCAAGACATCTCGCAATAGG-3'         |
| lin-8 (II) sgRNA F  | 5' -CTTTCTCACAGCAGTACGGGTTTTAGAGCTAGAAATAGCAAGT-3'    |
| lin-8 (II) sgRNA R  | 5' -CCGTACTGCTGTGAGAAAGCAAGACATCTCGCAATAGG-3'         |
| sqv-2 (II) sgRNA F  | 5' -CAACACCTTCAGCCATCAAGTTTTAGAGCTAGAAATAGCAAGT-3'    |
| sqv-2 (II) sgRNA R  | 5' -TTGATGGCTGAAGGTGTTGCAAGACATCTCGCAATAGG-3'         |

|                     |                                                    |
|---------------------|----------------------------------------------------|
| lin-31 (II) sgRNA F | 5' -AATGACAAGTTGTGTCGCAGTTTTAGAGCTAGAAATAGCAAGT-3' |
| lin-31 (II) sgRNA R | 5' -TGCGACACAACCTTGTCATTCAAGACATCTCGCAATAGG-3'     |
| sup-9 (II) sgRNA F  | 5' -AACACCGAAGATGAACGGAGTTTTAGAGCTAGAAATAGCAAGT-3' |
| sup-9 (II) sgRNA R  | 5' -TCCGTTTCATCTTCGGTGTTC AAGACATCTCGCAATAGG-3'    |
| emc-1 (II) sgRNA F  | 5' -CCTCTCTGGTGTGGAATACGTTTTAGAGCTAGAAATAGCAAGT-3' |
| emc-1 (II) sgRNA R  | 5' -GTATTCAACACCAGAGAGGCAAGACATCTCGCAATAGG-3'      |
| lon-2 (X) sgRNA F   | 5' -GGAAACTATACCCTCACTGGTTTTAGAGCTAGAAATAGCAAGT-3' |
| lon-2 (X) sgRNA R   | 5' -CAGTGAGGGTATAGTTTCCCAAGACATCTCGCAATAGG-3'      |
| mec-10 (X) sgRNA F  | 5' -TAGATTACCTGCGCCGTATGTTTTAGAGCTAGAAATAGCAAGT-3' |
| mec-10 (X) sgRNA R  | 5' -ATACGGCGCAGGTAATCTACAAGACATCTCGCAATAGG-3'      |
| F53B1.2 (X) sgRNA F | 5' -GCTAGTGCTTGCGGTTGTCGTTTTAGAGCTAGAAATAGCAAGT-3' |
| F53B1.2 (X) sgRNA R | 5' -GACAACCGCAAGCACTAGCCAAGACATCTCGCAATAGG-3'      |
| unc-18 (X) sgRNA F  | 5' -GTCAGTGGCACAAGGAACGGTTTTAGAGCTAGAAATAGCAAGT-3' |
| unc-18 (X) sgRNA R  | 5' -CGTTCCTTGTGCCACTGACCAAGACATCTCGCAATAGG-3'      |
| pal-1 (III) sgRNA F | 5' -GAAGTAGCAGTAGTGATAGGTTTTAGAGCTAGAAATAGCAAGT-3' |
| pal-1 (III) sgRNA R | 5' -CTATCACTACTGCTACTTCCAAGACATCTCGCAATAGG-3'      |
| dpy-3 (X) sgRNA F   | 5' -TCACCGTCCAGTCTGCTACGTTTTAGAGCTAGAAATAGCAAGT-3' |
| dpy-3 (X) sgRNA R   | 5' -GTAGCAGACTGGACGGTGACAAGACATCTCGCAATAGG-3'      |

---

**Targeting vector primers**

---

|                        |                                               |
|------------------------|-----------------------------------------------|
| pBluescript KS(+) F    | 5' -CTTATCGATACCGTCGACCTC-3'                  |
| pBluescript KS(+) R    | 5' -CTTGATATCGAATTCCTGCAGC-3'                 |
| egl-4 (IV) tv_Left F   | 5' -GAATTCGATATCAAGCTTTGTCACGTTTCGAAATCG-3'   |
| egl-4 (IV) tv_Left R   | 5' -CGGAAGTCGTCGACAATCTTC-3'                  |
| unc-17 (IV) tv_Right F | 5' -TGTCGACGACTTCCGAGCGGACGCCAAAAAGTGGC-3'    |
| unc-17 (IV) tv_Right R | 5' -GACGGTATCGATAAGTGTTCTGAAGCCATTTGGAA-3'    |
| egl-4 (IV) tv F        | 5' -CTTTGTCACGTTTCGAAATCG-3'                  |
| unc-17 (IV) tv R       | 5' -TGTTCTGAAGCCATTTGGAA-3'                   |
| unc-17 (IV) tv_Left F  | 5' -GAATTCGATATCAAGGGCGCCAGTTTCAAACATA-3'     |
| unc-17 (IV) tv_Left R  | 5' -TGTGCAAACCTCCTCTTTGAGGATCTCCGAGTCTCG-3'   |
| egl-4 (IV) tv_Right F  | 5' -AGAGGAGTTTGCACAGGTTAC-3'                  |
| egl-4 (IV) tv_Right R  | 5' -GACGGTATCGATAAGCCCGCCTCTTTCATGGAC-3'      |
| unc-17 (IV) tv F       | 5' -GGCGCCAGTTTCAAACATA-3'                    |
| egl-4 (IV) tv R        | 5' -CCCGCCTCTTTCATGGAC-3'                     |
| ced-2 (IV) tv_Left F   | 5' -GAATTCGATATCAAGGGCGCCAGTCAATCGTCGATC-3'   |
| ced-2 (IV) tv_Left R   | 5' -TTTTTGGCGTCCGCTTTGTACATTCGTTGGACATTTTC-3' |

|                         |                                            |
|-------------------------|--------------------------------------------|
| unc-17 (IV) tv_Right F2 | 5' -AGCGGACGCCAAAAAGTGGC-3'                |
| unc-17 (IV) tv_Right R  | 5' -GACGGTATCGATAAGTGTTCTGAAGCCATTTGGAA-3' |
| ced-2 (IV) tv F         | 5' -CTTTGTCACGTTTCGAAATCG-3'               |
| unc-17 (IV) tv R        | 5' -TGTTCTGAAGCCATTTGGAA-3'                |
| unc-17 (IV) tv_Left F   | 5' -GAATTCGATATCAAGGGCGCCAGTTTCAAACATA-3'  |
| unc-17 (IV) tv_Left R2  | 5' -TTGAGGATCTCCGAGTCTCG-3'                |
| ced-2 (IV) tv_Right F   | 5' -CTCGGAGATCCTCAAAGCGGAACTCGACGGCC-3'    |
| ced-2 (IV) tv_Right R   | 5' -GACGGTATCGATAAGACATTTCTAGGCGGGATCTC-3' |
| unc-17 (IV) tv F        | 5' -GGCGCCAGTTTCAAACATA-3'                 |
| ced-2 (IV) tv R         | 5' -ACATTTCTAGGCGGGATCTC-3'                |
| <hr/>                   |                                            |
| jtr-1 (IV) tv_Left F    | 5' -GAATTCGATATCAAGTCGACGGGAATGGGACGAC-3'  |
| jtr-1 (IV) tv_Left R    | 5' -TTTTTGGCGTCCGCTGGTTCCGCCGTGTTCCG-3'    |
| unc-17 (IV) tv_Right F2 | 5' -AGCGGACGCCAAAAAGTGGC-3'                |
| unc-17 (IV) tv_Right R  | 5' -GACGGTATCGATAAGTGTTCTGAAGCCATTTGGAA-3' |
| jtr-1 (IV) tv F         | 5' -TCGACGGGAATGGGACGAC-3'                 |
| unc-17 (IV) tv R        | 5' -TGTTCTGAAGCCATTTGGAA-3'                |
| unc-17 (IV) tv_Left F   | 5' -GAATTCGATATCAAGGGCGCCAGTTTCAAACATA-3'  |
| unc-17 (IV) tv_Left R2  | 5' -TTGAGGATCTCCGAGTCTCG-3'                |

|                        |                                                    |
|------------------------|----------------------------------------------------|
| jtr-1 (IV) tv_Right F  | 5' -CTCGGAGATCCTCAAACCGGAAAAGTGG-3'                |
| jtr-1 (IV) tv_Right R  | 5' -GACGGTATCGATAAGGTCGATTGCCTCGCCTGC-3'           |
| unc-17 (IV) tv F       | 5' -GGCGCCAGTTTCAAACATA-3'                         |
| jtr-1 (IV) tv R        | 5' -GTCGATTGCCTCGCCTGC-3'                          |
| <hr/>                  |                                                    |
| egl-4 (IV) tv_Left F2  | 5' -GAATTCGATATCAAGTACAGAGAATTCGGACAGCTG-3'        |
| egl-4 (IV) tv_Left R2  | 5' -GGAGAATCTATTCTGGAGAGGAGTTTGCACAGGTTACTG-3'     |
| unc-17 (IV) tv_Right F | 5' -TGTCGACGACTTCCGAGCGGACGCCAAAAGTGGC-3'          |
| csn-4 (IV) tv_Right R  | 5' -CAGAATAGATTCTCCATGTTTCATCAG-3'                 |
| egl-4 (IV) tv F2       | 5' -TACAGAGAATTCGGACAGCTG-3'                       |
| csn-4 (IV) tv R        | 5' -TCTGGAGATTATCCTGCTTTTTAAAGC-3'                 |
| csn-4 (IV) tv_Left F   | 5' -GAATTCGATATCAAGACTTTAAGAAAATTTTCGGACTTCCAGC-3' |
| csn-4 (IV) tv_Left R   | 5' -AAAGGAGTTATTCAAGAGCATAATATTACTG-3'             |
| egl-4 (IV) tv_Right F2 | 5' -TTGAATAACTCCTTTGGAAGTCGTCGACAATCTTCAC-3'       |
| egl-4 (IV) tv_Right R2 | 5' -GACGGTATCGATAAGGTCTTTGTCACGTTTCGAAATCG-3'      |
| csn-4 (IV) tv F        | 5' -AAAGCTGTAAGCCGCTGTG-3'                         |
| egl-4 (IV) tv R2       | 5' -GTCTTTGTCACGTTTCGAAATCG-3'                     |
| <hr/>                  |                                                    |
| dpy-2 (II) tv_Left F   | 5' -GAATTCGATATCAAGCCTTTCTTATCTCCGCCGAC-3'         |
| dpy-2 (II) tv_Left R   | 5' -GATGGTCCACGTTCTCCCG-3'                         |

|                        |                                            |
|------------------------|--------------------------------------------|
| lin-8 (II) tv_Right F  | 5' -AGAACGTGGACCATCGTACTGCTGTGAGAAAGCGA-3' |
| lin-8 (II) tv_Right R  | 5' -GACGGTATCGATAAGGGATTTTGGTGCAGCTCGAC-3' |
| dpy-2 (II) tv F        | 5' -CGCATTTTGAATGAGAAGTCA-3'               |
| lin-8 (II) tv R        | 5' -GGATTTTGGTGCAGCTCGAC-3'                |
| lin-8 (II) tv_Left F   | 5' -GAATTCGATATCAAGGACCTTGTGCGTTGAGGAAC-3' |
| lin-8 (II) tv_Left R   | 5' -AGTCCAGAGTCTCCTGGTGGCGGCGGGTCCCC-3'    |
| dpy-2 (II) tv_Right F  | 5' -AGGAGACTCTGGACTTCCAG-3'                |
| dpy-2 (II) tv_Right R  | 5' -GACGGTATCGATAAGGAAACAGTTACGGACGTCGC-3' |
| lin-8 (II) tv F        | 5' -GACCTTGTGCGTTGAGGAAC-3'                |
| dpy-2 (II) tv R        | 5' -GAAACAGTTACGGACGTCGC-3'                |
| <hr/>                  |                                            |
| emc-1 (II) tv_Left F   | 5' -GAATTCGATATCAAGGGCACTCCAATCGAATCGG-3'  |
| emc-1 (II) tv_Left R   | 5' -CTCGAACATTCCGGAATTCAACACCAGAGAGGCC-3'  |
| lin-31 (II) tv_Right F | 5' -TCCGGAATGTTTCGAGAACGG-3'               |
| lin-31 (II) tv_Right R | 5' -GACGGTATCGATAAGGGGTAGTACCGGGAGGAGAG-3' |
| emc-1 (II) tv F        | 5' -GGCACTCCAATCGAATCGG-3'                 |
| lin-31 (II) tv R       | 5' -GGGTAGTACCGGGAGGAGAG-3'                |
| lin-31 (II) tv_Left F  | 5' -GAATTCGATATCAAGAGGTATGAGTTGGGGGTTTG-3' |
| lin-31 (II) tv_Left R  | 5' -GGCATTTGGGTGCACCG-3'                   |



|                        |                                                   |
|------------------------|---------------------------------------------------|
| emc-1 (II) tv_Right F  | 5' -GTGCACCCAAATGCCACCGGCAATATTGGTGAGTTTTTTG-3'   |
| emc-1 (II) tv_Right R  | 5' -GACGGTATCGATAAGTTCTTGGACGTGACAGCTGG-3'        |
| lin-31 (II) tv F       | 5' -AGGTATGAGTTGGGGGTTTG-3'                       |
| emc-1 (II) tv R        | 5' -TTCTTGGACGTGACAGCTGG-3'                       |
| <hr/>                  |                                                   |
| sup-9 (II) tv_Left F   | 5' -GAATTCGATATCAAGCCCGCTAGCAAGAGAGTGTG-3'        |
| sup-9 (II) tv_Left R   | 5' -CTCGAACATTCCGGACGTTTCATCTTCGGTGTTTCATAGTC-3'  |
| lin-31 (II) tv_Right F | 5' -TCCGGAATGTTTCGAGAACGG-3'                      |
| lin-31 (II) tv_Right R | 5' -GACGGTATCGATAAGGGGTAGTACCGGGAGGAGAG-3'        |
| sup-9 (II) tv F        | 5' -CCCGCTAGCAAGAGAGTGTG-3'                       |
| lin-31 (II) tv R       | 5' -GGGTAGTACCGGGAGGAGAG-3'                       |
| lin-31 (II) tv_Left F  | 5' -GAATTCGATATCAAGAGGTATGAGTTGGGGGTTTG-3'        |
| lin-31 (II) tv_Left R  | 5' -GGCATTGTTGGGTGCACCG-3'                        |
| sup-9 (II) tv_Right F  | 5' -GTGCACCCAAATGCCGAGGGATGAACAGTGAGTTTTTTTCTG-3' |
| sup-9 (II) tv_Right R  | 5' -GACGGTATCGATAAGTCTCCTTGTTGCCCGAAATC-3'        |
| lin-31 (II) tv F       | 5' -AGGTATGAGTTGGGGGTTTG-3'                       |
| sup-9 (II) tv R        | 5' -TCTCCTTGTTGCCCGAAATC-3'                       |
| <hr/>                  |                                                   |
| dpy-2 (II) tv_Left F   | 5' -GAATTCGATATCAAGCCTTTCTTATCTCCGCCGAC-3'        |
| dpy-2 (II) tv_Left R   | 5' -GATGGTCCACGTTCTCCCG-3'                        |

|                       |                                               |
|-----------------------|-----------------------------------------------|
| sqv-2 (II) tv_Right F | 5' -AATGGTTCGGAGCAATTTTAAGC-3'                |
| sqv-2 (II) tv_Right R | 5' -GACGGTATCGATAAGTTTGACGTCGTTCTGTTTCG-3'    |
| dpy-2 (II) tv F       | 5' -CGCATTTTGAATGAGAAGTCA-3'                  |
| sqv-2 (II) tv R       | 5' -TTTGACGTCGTTCTGTTTCG-3'                   |
| sqv-2 (II) tv_Left F  | 5' -GAATTCGATATCAAGCGTATTTCCACGTGTCTATCCG-3'  |
| sqv-2 (II) tv_Left R  | 5' -AGTCCAGAGTCTCCTGATGGCTGAAGGTGTTGCT-3'     |
| dpy-2 (II) tv_Right F | 5' -AGGAGACTCTGGACTTCCAG-3'                   |
| dpy-2 (II) tv_Right R | 5' -GACGGTATCGATAAGGAAACAGTTACGGACGTCGC-3'    |
| sqv-2 (II) tv F       | 5' -CGTATTTCCACGTGTCTATCCG-3'                 |
| dpy-2 (II) tv R       | 5' -GAAACAGTTACGGACGTCGC-3'                   |
| <hr/>                 |                                               |
| lon-2 (X) tv_Left F   | 5' -GAATTCGATATCAAGAGCCATTGTGCAATTGCATG-3'    |
| lon-2 (X) tv_Left R   | 5' -CTGTGGAAGTGAAAAACATGCA-3'                 |
| mec-10 (X) tv_Right F | 5' -TTTTCACTTCCACAGTATGGGGATTGTGTAGAGGATG-3'  |
| mec-10 (X) tv_Right R | 5' -GACGGTATCGATAAGCTCCTGACCAAAGTCCAAGG-3'    |
| lon-2 (X) tv F        | 5' -AGCCATTGTGCAATTGCATG-3'                   |
| mec-10 (X) tv R       | 5' -CTCCTGACCAAAGTCCAAGG-3'                   |
| mec-10 (X) tv_Left F  | 5' -GAATTCGATATCAAGTGGCGATAGTGAAGATTTCTCTG-3' |
| mec-10 (X) tv_Left R  | 5' -GAAACTATAACCCTCACGGCGCAGGTAATCTACTC-3'    |

|                        |                                                    |
|------------------------|----------------------------------------------------|
| lon-2 (X) tv_Right F   | 5' -TGAGGGTATAGTTTCCCTTTTGT-3'                     |
| lon-2 (X) tv_Right R   | 5' -GACGGTATCGATAAG AGAGAGCGACAAGTGATGGG-3'        |
| mec-10 (X) tv F        | 5' -TGGCGATAGTGAAGATTTCTCTG-3'                     |
| lon-2 (X) tv R         | 5' -AGAGAGCGACAAGTGATGGG-3'                        |
| <hr/>                  |                                                    |
| F53B1.2 (X) tv_Left F  | 5' -GAATTCGATATCAAGTTTGCGTTCTTGCACTCGCG-3'         |
| F53B1.2 (X) tv_Left R  | 5' -CAACCGCAAGCACTAGCCC-3'                         |
| unc-18 (X) tv_Right F  | 5' -TAGTGCTTGCGGTTGCGAGGACAACAATCCAACACTATCGC-3'   |
| unc-18 (X) tv_Right R  | 5' -GACGGTATCGATAAGAAATAGTTATTCCGTCGAGTTGATC-3'    |
| F53B1.2 (X) tv F       | 5' -TTTGCGTTCTTGCACTCGCG-3'                        |
| unc-18 (X) tv R        | 5' -AAATAGTTATTCCGTCGAGTTGATC-3'                   |
| unc-18 (X) tv_Left F   | 5' -GAATTCGATATCAAGTGGCGATAGTGAAGATTTCTCTG-3'      |
| unc-18 (X) tv_Left R   | 5' -TTCCTTGTGCCACTGACCATATC-3'                     |
| F53B1.2 (X) tv_Right F | 5' -CAGTGGCACAAGGAATCTGGTTTACTGTGCTCTTTTTCCACAA-3' |
| F53B1.2 (X) tv_Right R | 5' -GACGGTATCGATAAGTTCAAAGAACCACCCGAGCG-3'         |
| unc-18 (X) tv F        | 5' -TGGCGATAGTGAAGATTTCTCTG-3'                     |
| F53B1.2 (X) tv R       | 5' -TTCAAAGAACCACCCGAGCG-3'                        |
| <hr/>                  |                                                    |
| pal-1 (III) tv_Left F  | 5' -GAATTCGATATCAAGGACAGTTTCCTGCACAGACC-3'         |
| pal-1 (III) tv_Left R  | 5' -TTTTTGGCGTCCGCTATCACTACTGCTACTTCCAT-3'         |

|                        |                                               |
|------------------------|-----------------------------------------------|
| unc-17 (IV) tv_Right F | 5' -AGCGGACGCCAAAAAGTGGC-3'                   |
| unc-17 (IV) tv_Right R | 5' -GACGGTATCGATAAGTGTTCTGAAGCCATTTGGAA-3'    |
| pal-1 (III) tv F       | 5' -GACAGTTTCCTGCACAGACC-3'                   |
| unc-17 (IV) tv R       | 5' -TGTTCTGAAGCCATTTGGAA-3'                   |
| unc-17 (IV) tv_Left F  | 5' -GAATTCGATATCAAGGGCGCCAGTTTCAAACATA-3'     |
| unc-17 (IV) tv_Left R3 | 5' -TGGATACATTCCACTTTGAGGATCTCCGAGTCTCG-3'    |
| pal-1 (III) tv_Right F | 5' -AGTGGAATGTATCCATCACCG-3'                  |
| pal-1 (III) tv_Right R | 5' -CGGTATCGATATAGCTTCGGTATTTGTCAGCTGTTTCG-3' |
| unc-17 (IV) tv F       | 5' -GGCGCCAGTTTCAAACATA-3'                    |
| pal-1 (III) tv R       | 5' -CGGTATTTGTCAGCTGTTTCG-3'                  |

---

### **Genotyping primers**

---

|                      |                              |
|----------------------|------------------------------|
| egl-4-unc-17 (IV) F  | 5' -CTTTGTCACGTTTCGAAATCG-3' |
| egl-4-unc-17 (IV) R  | 5' -TAAATTGCTCGGCGAGTTG-3'   |
| egl-4-unc-17 (IV) F2 | 5' -TTGCACGAATTTTGGAGGA-3'   |
| egl-4-unc-17 (IV) R2 | 5' -TTTAATGCCAGGAATGGGGA-3'  |
| unc-17-egl-4 (IV) F  | 5' -GGCGCCAGTTTCAAACATA-3'   |
| unc-17-egl-4 (IV) R  | 5' -AAGGCATACCTCGAGCAGC-3'   |

|                      |                                  |
|----------------------|----------------------------------|
| unc-17-egl-4 (IV) F2 | 5' -TGGCGGGAAATAAAAAGAACA-3'     |
| unc-17-egl-4 (IV) R2 | 5' -TTACAGAGAATTCGGACAGCTG-3'    |
| <hr/>                |                                  |
| ced-2-unc-17 (IV) F  | 5' -GAACCAGGATTGGTGGGAGG-3'      |
| ced-2-unc-17 (IV) R  | 5' -TAAATTGCTCGGCGAGTTG-3'       |
| ced-2-unc-17 (IV) F2 | 5' -AACCACTGGATTAGTGCCGG-3'      |
| ced-2-unc-17 (IV) R2 | 5' -TTTAATGCCAGGAATGGGGA-3'      |
| unc-17-ced-2 (IV) F  | 5' -CTGACGAATATGCCGCAAAC-3'      |
| unc-17-ced-2 (IV) R  | 5' -TTTCAGAGATTCCTGGCCCG-3'      |
| unc-17-ced-2 (IV) F2 | 5' -TGGCGGGAAATAAAAAGAACA-3'     |
| unc-17-ced-2 (IV) R2 | 5' -GAGAAAAATACGCCGAGCTTTC-3'    |
| <hr/>                |                                  |
| jtr-1-unc-17 (IV) F  | 5' -CTCAGCCACAGATGTTTCACGG-3'    |
| jtr-1-unc-17 (IV) R  | 5' -TAAATTGCTCGGCGAGTTG-3'       |
| jtr-1-unc-17 (IV) F2 | 5' -GTGTGGATAGGGCTGTGTCG-3'      |
| jtr-1-unc-17 (IV) R2 | 5' -TTTAATGCCAGGAATGGGGA-3'      |
| unc-17-jtr-1 (IV) F  | 5' -CTGACGAATATGCCGCAAAC-3'      |
| unc-17-jtr-1 (IV) R  | 5' -TCCTTACACTATGTAGTCTGTGAAG-3' |
| unc-17-jtr-1 (IV) F2 | 5' -TGGCGGGAAATAAAAAGAACA-3'     |
| unc-17-jtr-1 (IV) R2 | 5' -CTCCAGAAGTCGATTGCCT-3'       |

---

|                     |                                           |
|---------------------|-------------------------------------------|
| egl-4-csn-4 (IV) F  | 5' -TGGCGTGACTAAATAGGCTC-3'               |
| egl-4-csn-4 (IV) R  | 5' -TTTTAAAAAATTGTGAAATTTTCGCTGAATCACG-3' |
| egl-4-csn-4 (IV) F2 | 5' -ATTGTCCTAATAGGCTCCGC-3'               |
| egl-4-csn-4 (IV) R2 | 5' -CCTTTAAACTCACCTAAAAGTGTGG-3'          |
| csn-4-egl-4 (IV) F  | 5' -ACTTTAAGAAAATTTTCGGACTTCCAGC-3'       |
| csn-4-egl-4 (IV) R  | 5' -TTGCAGAAATTCTTACAATTTAAAGGAG-3'       |
| csn-4-egl-4 (IV) F2 | 5' -TATTTAACTGAACATTTATGACAATTCCG-3'      |
| csn-4-egl-4 (IV) R2 | 5' -TATGTCCGAAGTTGAAGCCG-3'               |

---

|                     |                                  |
|---------------------|----------------------------------|
| dpy-2-lin-8 (II) F  | 5' -TGAGTGTAATCACTACGTGACC-3'    |
| dpy-2-lin-8 (II) R  | 5' -GTGGCTCGACGCACAAGG-3'        |
| dpy-2-lin-8 (II) F2 | 5' -CTCGTCTTCTGGATCGGATAC-3'     |
| dpy-2-lin-8 (II) R2 | 5' -GATCTTTCGCTACTTTCACCG-3'     |
| lin-8-dpy-2 (II) F  | 5' -ATTGTTGATCATGGCCGGGG-3'      |
| lin-8-dpy-2 (II) R  | 5' -CGTTGTGGCCACATGTTTCG-3'      |
| lin-8-dpy-2 (II) F2 | 5' -ACCGCAGTGGGTTTATCGAC-3'      |
| lin-8-dpy-2 (II) R2 | 5' -GATGTAGTACATGACCGATATCTCC-3' |

---

|                     |                             |
|---------------------|-----------------------------|
| emc-1-lin-31 (II) F | 5' -TGCCCCAGTCCTAAATGGAG-3' |
| emc-1-lin-31 (II) R | 5' -TGCCTAAGTGCTTGCCTACA-3' |

|                      |                               |
|----------------------|-------------------------------|
| emc-1-lin-31 (II) F2 | 5' -TATTTTCGCCTCGGTGACG-3'    |
| emc-1-lin-31 (II) R2 | 5' -AACTATTGCAACAGATGGCAC-3'  |
| lin-31-emc-1 (II) F  | 5' -GAGCAGAAGCCACCGTACTC-3'   |
| lin-31-emc-1 (II) R  | 5' -CAAAAGCTCCATCCTCGGTG-3'   |
| lin-31-emc-1 (II) F2 | 5' -GATAAAATGCTCCCGCTCAC-3'   |
| lin-31-emc-1 (II) R2 | 5' -CGACACGTGGATTACAACGTC-3'  |
| <hr/>                |                               |
| sup-9-lin-31 (II) F  | 5' -GCTCCGTTTCATAAGACGAGC-3'  |
| sup-9-lin-31 (II) R  | 5' -TGCCTAAGTGCTTGCCTACA-3'   |
| sup-9-lin-31 (II) F2 | 5' -GGAAACAACCAATAGTGACGTC-3' |
| sup-9-lin-31 (II) R2 | 5' -AACTATTGCAACAGATGGCAC-3'  |
| lin-31-sup-9 (II) F  | 5' -GAGCAGAAGCCACCGTACTC-3'   |
| lin-31-sup-9 (II) R  | 5' -GAGGTACCTGGTGAGAAGAC-3'   |
| lin-31-sup-9 (II) F2 | 5' -GATAAAATGCTCCCGCTCAC-3'   |
| lin-31-sup-9 (II) R2 | 5' -GCATTATGGACTGAGATTCGTC-3' |
| <hr/>                |                               |
| dpy-2-sqv-2 (II) F   | 5' -TGAGTGTAATCACTACGTGACC-3' |
| dpy-2-sqv-2 (II) R   | 5' -TTCCGACGGCGAATTTTGCG-3'   |
| dpy-2-sqv-2 (II) F2  | 5' -CTCGTCTTCTGGATCGGATAC-3'  |
| dpy-2-sqv-2 (II) R2  | 5' -CGGAACCATGTGTCACGGAC-3'   |

|                       |                                        |
|-----------------------|----------------------------------------|
| sqv-2-dpy-2 (II) F    | 5' -CGCCCGTATTTCCACG-3'                |
| sqv-2-dpy-2 (II) R    | 5' -CGTTGTGGCCACATGTTTCG-3'            |
| sqv-2-dpy-2 (II) F2   | 5' -CCTCTTCTCTTGTACTTGTTCGAC-3'        |
| sqv-2-dpy-2 (II) R2   | 5' -GATGTAGTACATGACCGATATCTCC-3'       |
| <hr/>                 |                                        |
| lon-2-mec-10 (X) F    | 5' -TTTGGCTGCCCACTCTCGAG-3'            |
| lon-2-mec-10 (X) R    | 5' -TGCTGGTTTATGTGATGTGC-3'            |
| lon-2-mec-10 (X) F2   | 5' -TGTGATTCCAGCCATTGTGC-3'            |
| lon-2-mec-10 (X) R2   | 5' -CCATGTATATCAGCTCAAAGGC-3'          |
| mec-10-lon-2 (X) F    | 5' -CATGCTGTAACTGAAGTCCTG-3'           |
| mec-10-lon-2 (X) R    | 5' -TTCCATCCGGTGAGCCCTTC-3'            |
| mec-10-lon-2 (X) F2   | 5' -TCCAGGCTGCAATGGTATTG-3'            |
| mec-10-lon-2 (X) R2   | 5' -CCCATCTTGCAATCAGTTGTTC-3'          |
| <hr/>                 |                                        |
| F53B1.2-unc-18 (X) F  | 5' -ATTCAGGCCTTGTGTGGCTG-3'            |
| F53B1.2-unc-18 (X) R  | 5' -GTGACATTTTGGGAATATAGTCATTATTGTG-3' |
| F53B1.2-unc-18 (X) F2 | 5' -TTCTACGTTTCCTTCAACTAATCTTC-3'      |
| F53B1.2-unc-18 (X) R2 | 5' -ACACAACGTCAAATCACAATCC-3'          |
| unc-18-F53B1.2 (X) F  | 5' -TCAAGCAATGTGCTACGACC-3'            |
| unc-18-F53B1.2 (X) R  | 5' -TTCTTGCGATCCATATTCAAAG-3'          |



|                           |                                  |
|---------------------------|----------------------------------|
| unc-18-F53B1.2 (X) F2     | 5' -TGACGTTTACAAGTACGAAACG-3'    |
| unc-18-F53B1.2 (X) R2     | 5' -CGGGAACCAGGTCCTCATCC -3'     |
| <hr/>                     |                                  |
| pal-1-unc-17 (III;IV) F   | 5' -GACAGTTTCCTGCACAGACC-3'      |
| pal-1-unc-17 (III;IV) R   | 5' -TAAATTGCTCGGCGAGTTG-3'       |
| pal-1-unc-17 (III;IV) F2  | 5' -TGTCACGTGGCCTCACTATC-3'      |
| pal-1-unc-17 (III;IV) R2  | 5' -TTTAATGCCAGGAATGGGGA-3'      |
| unc-17- pal-1 (III;IV) F  | 5' -GGCGCCAGTTTCAAAACATA-3'      |
| unc-17- pal-1 (III;IV) R  | 5' -TCCACGAGAATCCCTGAAAC-3'      |
| unc-17- pal-1 (III;IV) F2 | 5' -CTGACGAATATGCCGCAAAC-3'      |
| unc-17- pal-1 (III;IV) R2 | 5' -CAGATCAAAAATTGGCTGCTT-3'     |
| <hr/>                     |                                  |
| lin-1 (IV) F              | 5' -CTTGGGTTTCGACATGTGTC-3'      |
| lin-1 (IV) R              | 5' -CTTAGGGCTATGCGCCTTTA-3'      |
| <hr/>                     |                                  |
| jtr-1 (IV) F              | 5' -CTCAGCCACAGATGTTACGG-3'      |
| jtr-1 (IV) R              | 5' -TCCTTACACTATGTAGTCTGTGAAG-3' |
| jtr-1 (IV) F2             | 5' -GTGTGGATAGGGCTGTGTCG-3'      |
| jtr-1 (IV) R2             | 5' -CTCCAGAAGTCGATTGCCT-3'       |
| <hr/>                     |                                  |
| unc-17 (IV) F             | 5' -CTGACGAATATGCCGCAAAC-3'      |
| unc-17 (IV) R             | 5' -TAAATTGCTCGGCGAGTTG-3'       |

|                |                                  |
|----------------|----------------------------------|
| unc-17 (IV) F2 | 5' -TGGCGGGAAATAAAAAGAACA-3'     |
| unc-17 (IV) R2 | 5' -TTTAATGCCAGGAATGGGGA-3'      |
| <hr/>          |                                  |
| mlt-7 (II) F   | 5' -CTTGAGGCCTAGGTAGGCTC-3'      |
| mlt-7 (II) R   | 5' -GCCTGTGCAATACTGTCTTT-3'      |
| <hr/>          |                                  |
| lin-8 (II) F   | 5' -ATTGTTGATCATGGCCGGGG-3'      |
| lin-8 (II) R   | 5' -GTGGCTCGACGCACAAGG-3'        |
| lin-8 (II) F2  | 5' -ACCGCAGTGGGTTTATCGAC-3'      |
| lin-8 (II) R2  | 5' -GATCTTTCGCTACTTTCACCG-3'     |
| <hr/>          |                                  |
| dpy-2 (II) F   | 5' -TGAGTGTAATCACTACGTGACC-3'    |
| dpy-2 (II) R   | 5' -CGTTGTGGCCACATGTTTCG-3'      |
| dpy-2 (II) F2  | 5' -CTCGTCTTCTGGATCGGATAC-3'     |
| dpy-2 (II) R2  | 5' -GATGTAGTACATGACCGATATCTCC-3' |
| <hr/>          |                                  |
| dpy-3 (X) F    | 5' -CTCTAATGATTGGTGACGTTGG-3'    |
| dpy-3 (X) R    | 5' -CTTTTTCTGGAGTCAGATGACAG-3'   |
| dpy-3 (X) F2   | 5' -CTCCAGATACGCTTAGAAAATAGC-3'  |
| dpy-3 (X) R2   | 5' -TCTCGTAATGACGTAAATGTGTATG-3' |

---

**Integrated-site genome primers**

---

dpy-3 (X) Is F            5' -CGACTCTAGAGGATCCGAACAGTGAAGTAGACTTCTGCAAG-3'

dpy-3 (X) Is R            5' -CGCTCAGTTGGAATTCCATCTTGTCTGATGTACCGGCAT-3'

---

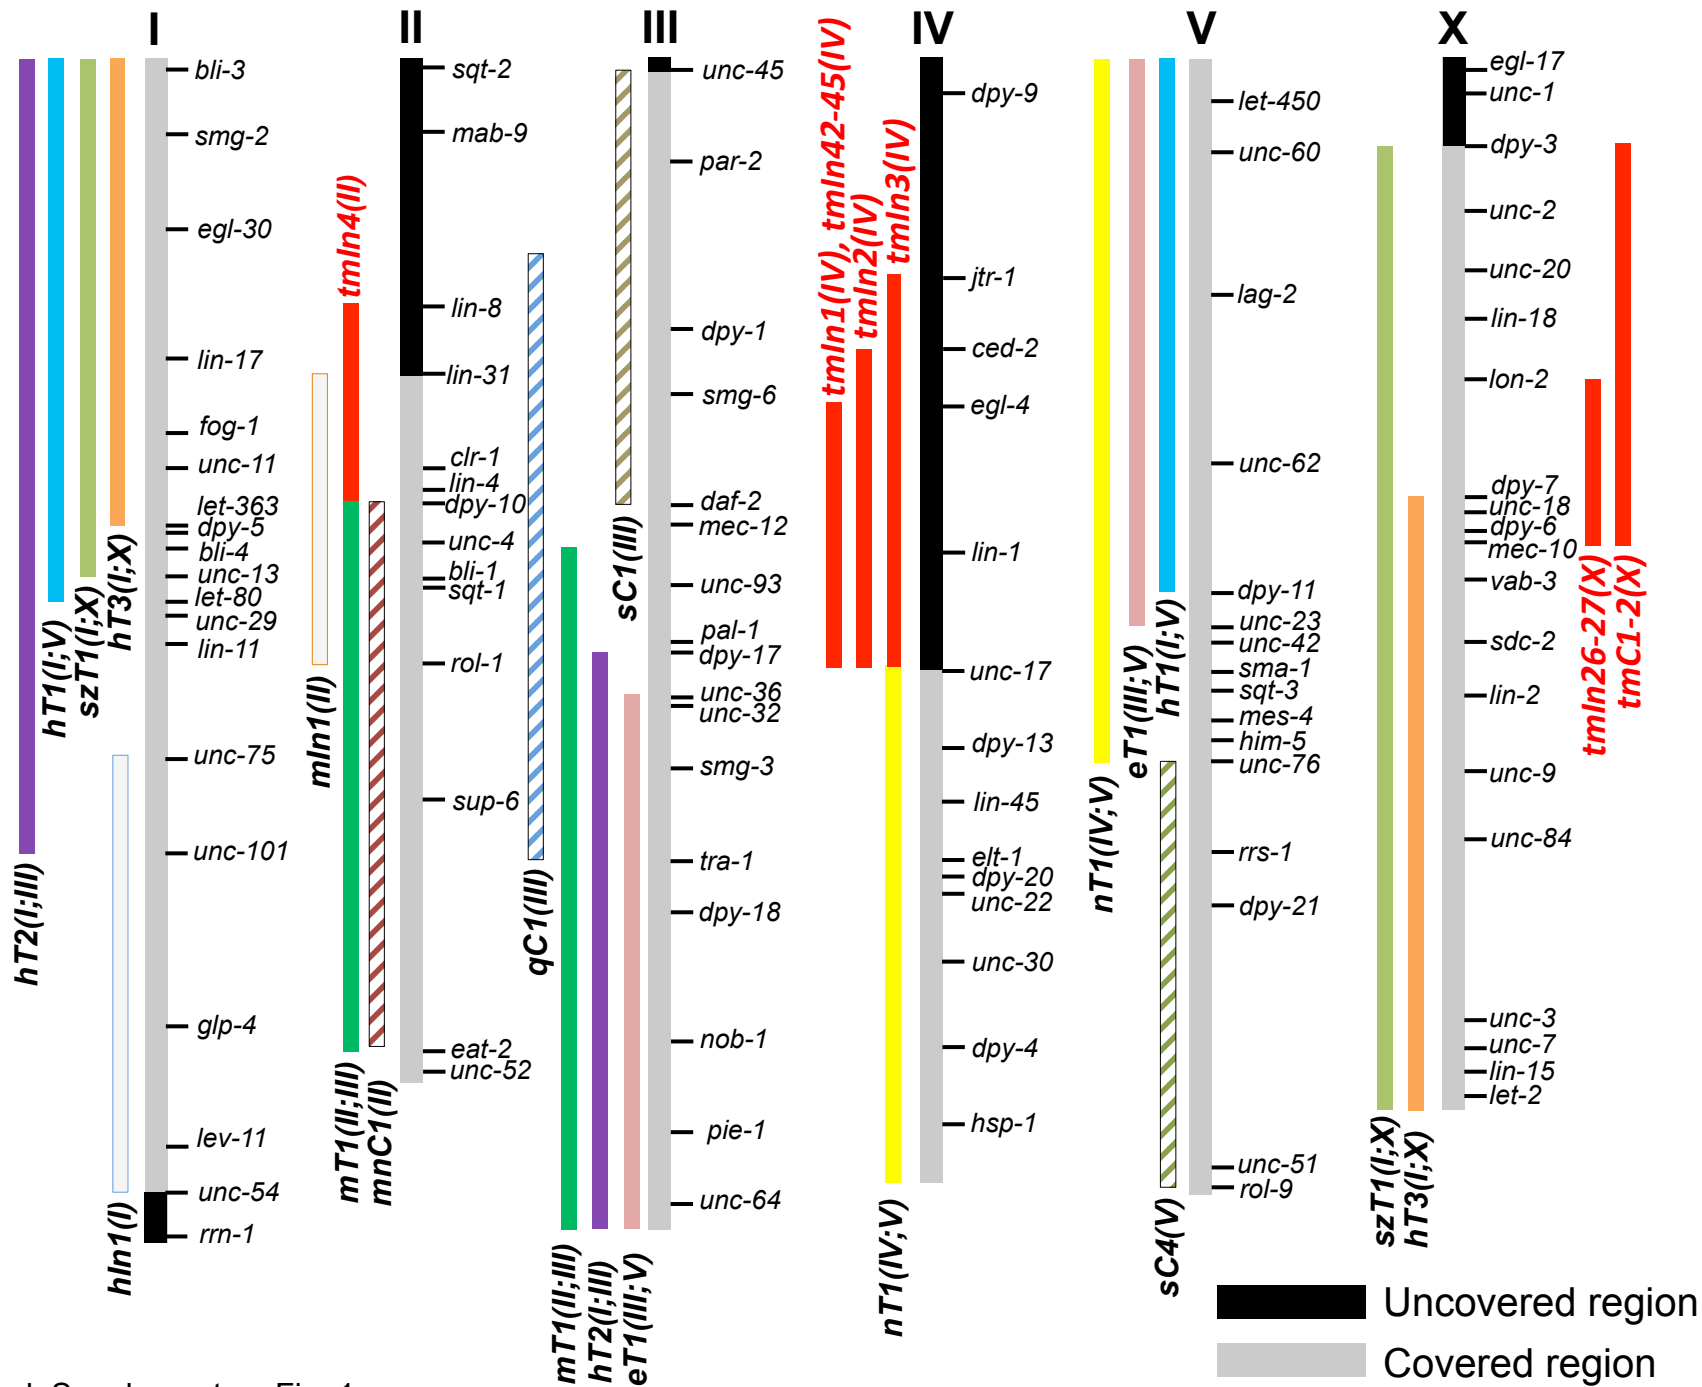

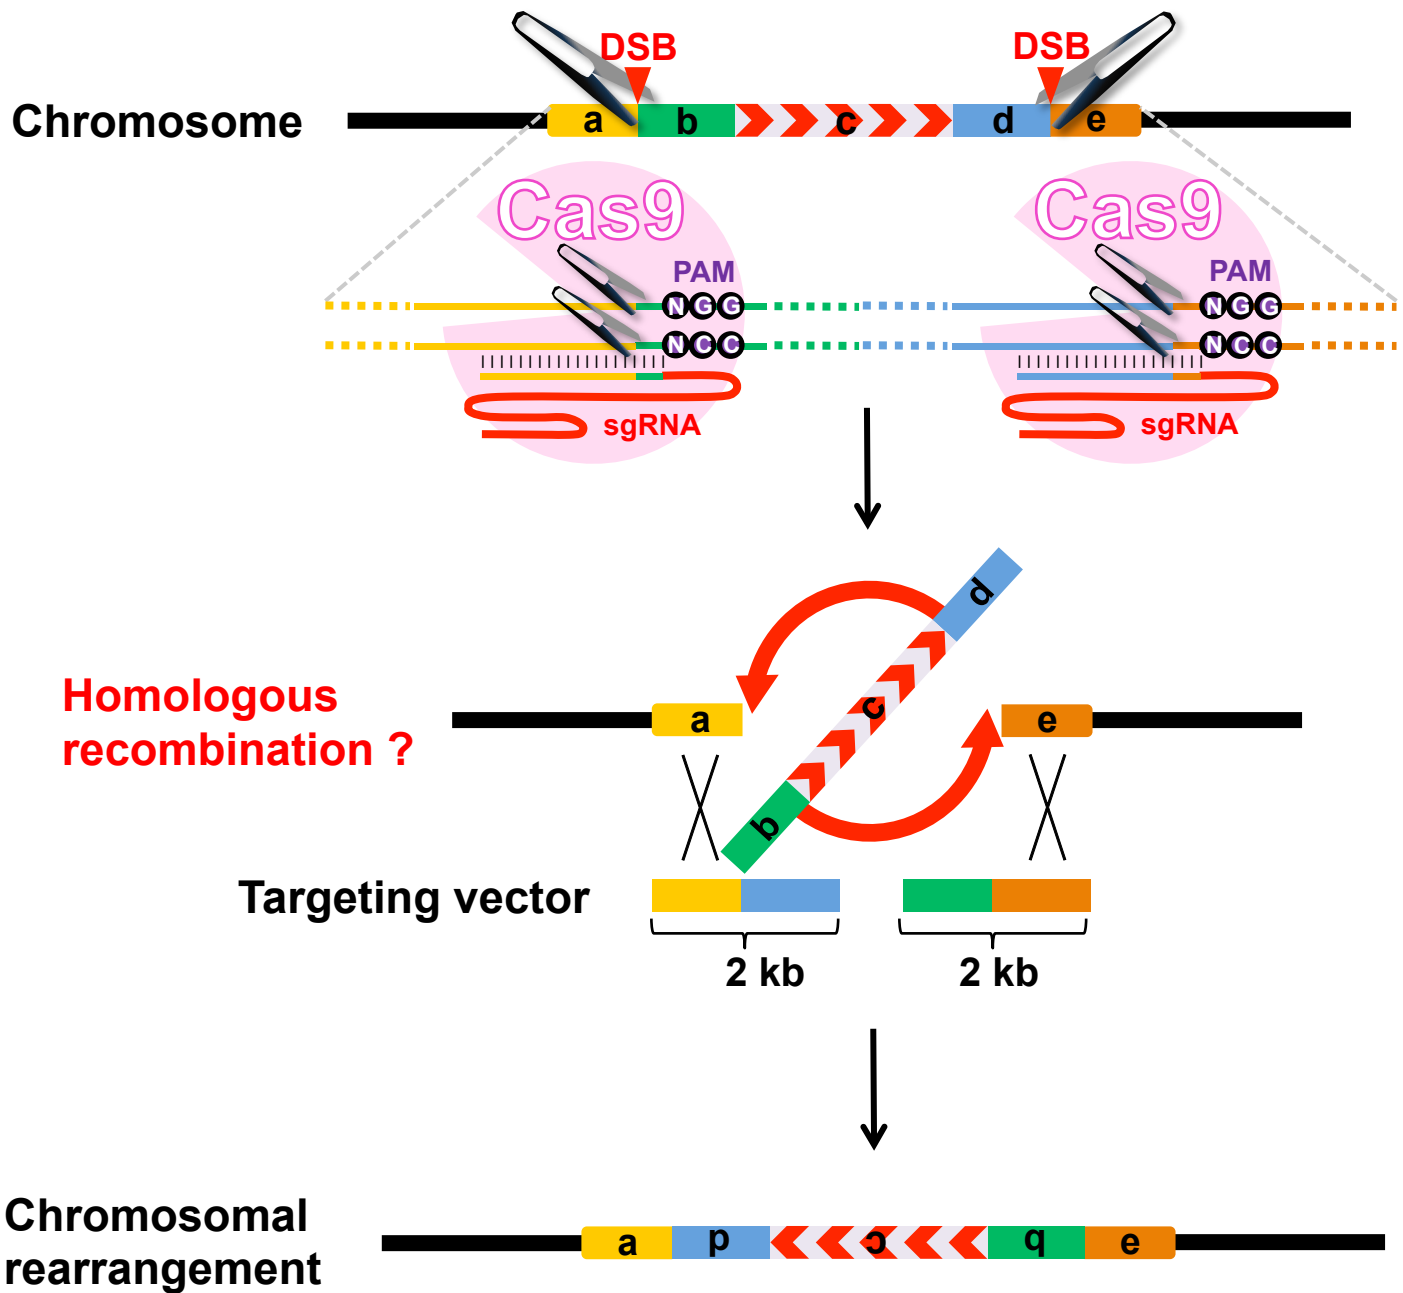

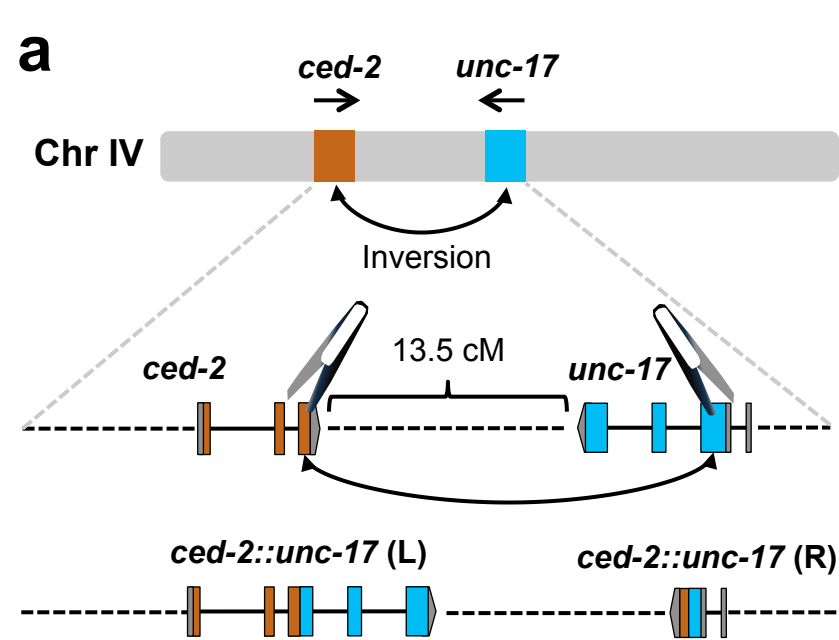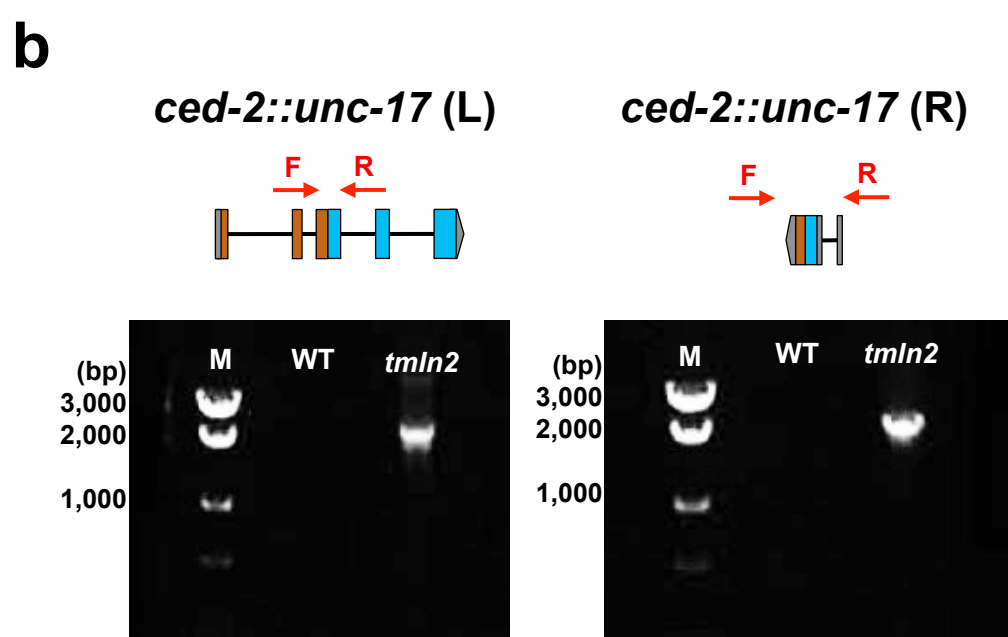

**c**

*ced-2::unc-17* (L)

WT (*ced-2* gene)

ATGTCCAACGGAATGTACAAAGCGGAACTCGACGGCCAAATTGGCTCGGTGCCTCATAACATACCTC  
TACAGGTTGCCTTACATGTTTCGCCTTGAGCTGCCGGTTTAACCGAGCCACGGAGTATGTATGGAG

Targeting vector      ATGTCCAACGGAATGTACAA-----AGCGGACGCCAAAAGTGGC

*tmln2* (-8 bp, +26 bp)      ATGTCCAACGGAATGT---CCCGAAGGTATTTTCGGAATATTCCAG-----GACGCCAAAAGTGGC

*ced-2::unc-17* (R)

WT (*unc-17* gene)

ATCCTGCTGCTCAAGCCACTTTTTGGCGTCCGCTTTGAGGATCTCCGAGTCTCGGTTGATGACGGG  
TAGGACGACGAGTTCGGTGAAAACCGCAGGCGAAACTCCTAGAGGCTCAGAGCCAACACTACTGCC

Targeting vector      GGCACCGAGCCAATTTGGCCGTCGAGTTCCGCT--TTGAGGATCTCCGAGTCTCGGTTGATGACGGG

*tmln2* (-5 bp, +1 bp)      GGCACCGAGCCAATTTGGCCGTCGAGTTCCGCT-A----GATCTCCGAGTCTCGGTTGATGACGGG

▼ PAM      PAM ▼

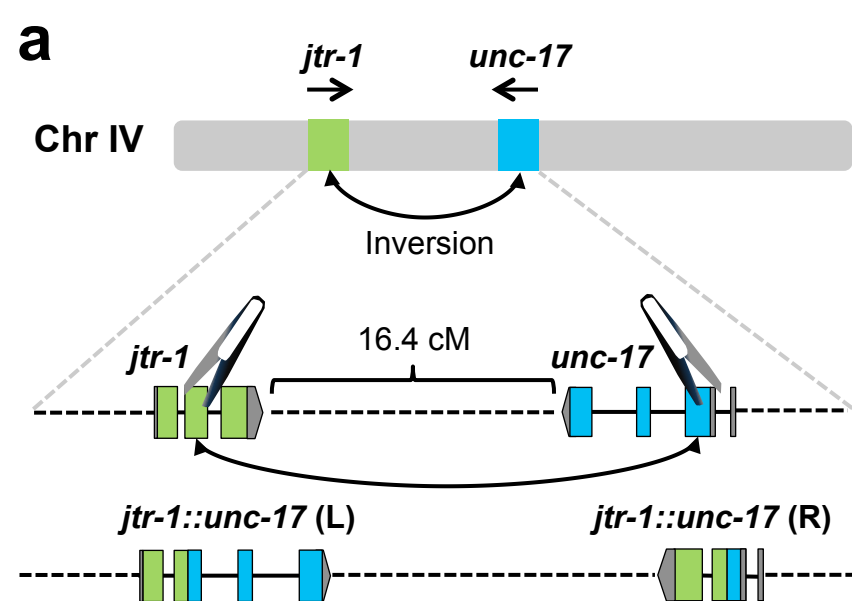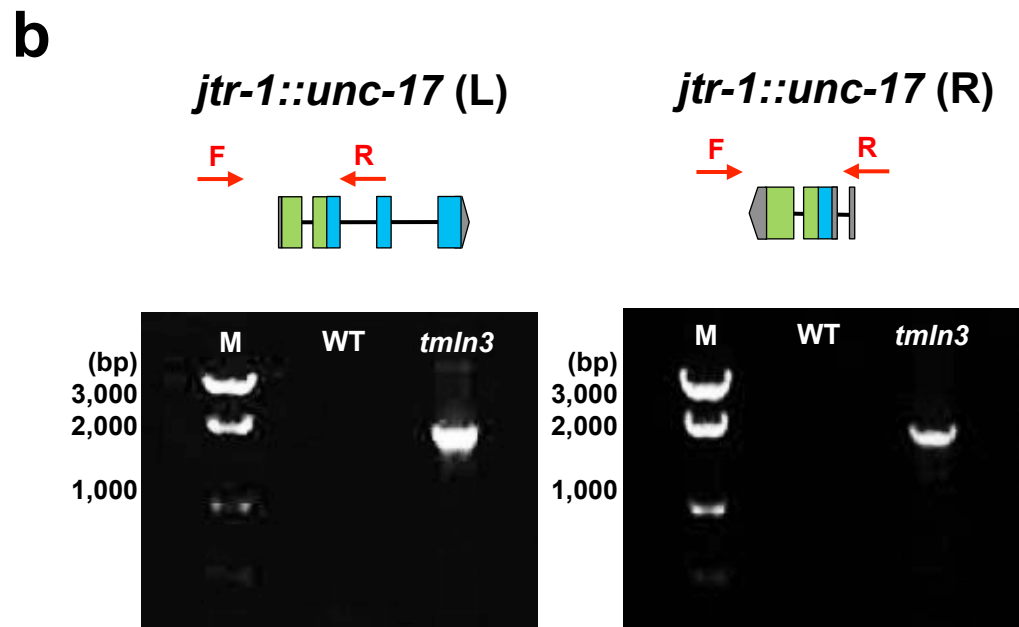

**c**

*jtr-1::unc-17* (L)

WT (*jtr-1* gene)

▼ PAM

TTGAATTTTCAGAGACGGAACACGGCGGAACCACCGGAAACTGGAAAAGTGGTGACGGAATA  
AACTTAAAAGTCTCTGCCTTGTGCCGCCTTGGTGGCCTTTTGACCTTTTTCACCACTGCCTTAT

Targeting vector  
*tmIn3* (-4 bp)

CAGAATTTTCAGAGACGGAACACGGCGGAACCAGCGGACGCCAAAAAGTGGCTTGAGCAGCAGG  
CAGAATTTTCAGAGACGGAACACGGCGG----AGCGGACGCCAAAAAGTGGCTTGAGCAGCAGG

*jtr-1::unc-17* (R)

WT (*unc-17* gene)

PAM ▼

TCCTGCTGCTCAAGCCACTTTTGGCGTCCGCTTTGAGGATCTCCGAGTCTCGGTTGATGACGG  
AGGACGACGAGTTCGGTGAAAACCGCAGGCGAACTCCTAGAGGCTCAGAGCCAACACTACTGCC

Targeting vector  
*tmIn3* (-2 bp)

ATATTCCGTCACCACTTTTCCAGTTTTCCGGTTTGAGGATCTCCGAGTCTCGGTTGATGACGG  
ATATTCCGTCACCACTTTTCCAGTTTTCCGGT--GAGGATCTCCGAGTCTCGGTTGATGACGG

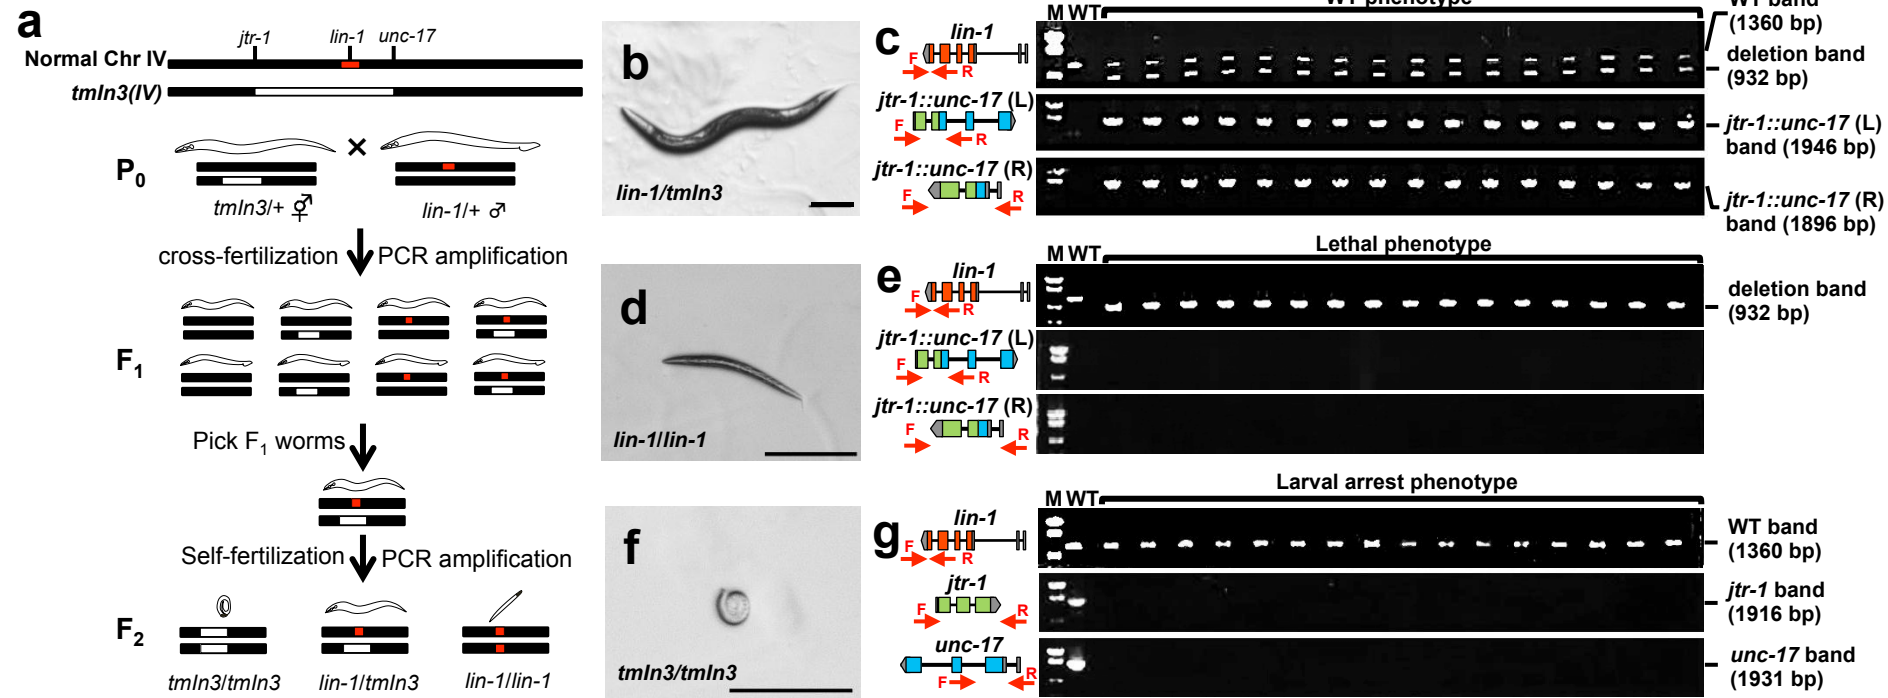



### a Split read (SR) analysis

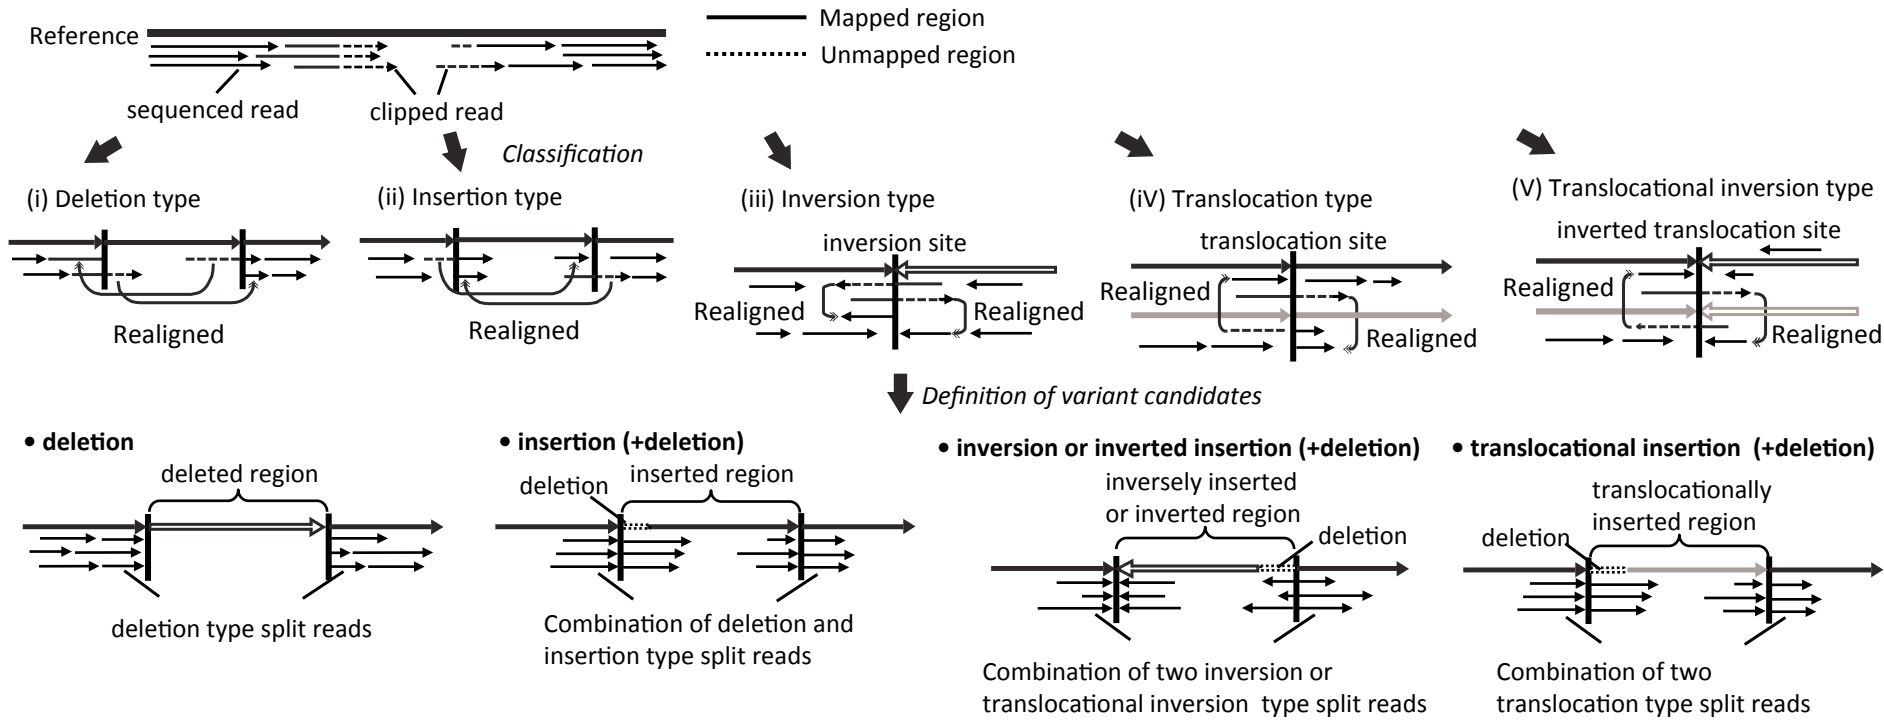

### b Copy number (CN) analysis

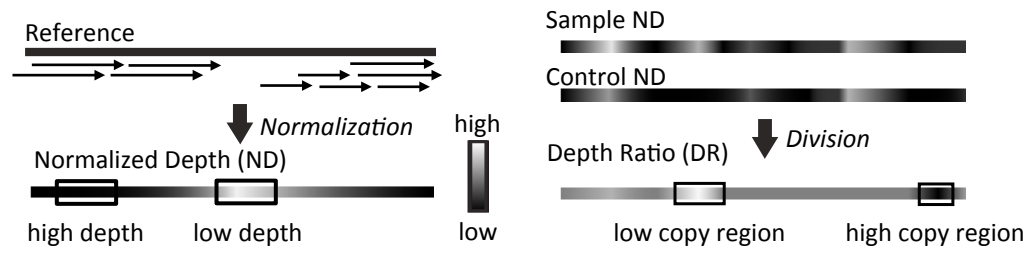

### c Split read and copy number analysis

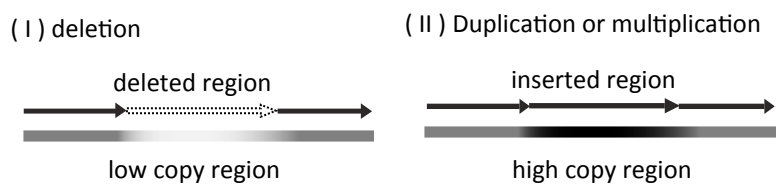

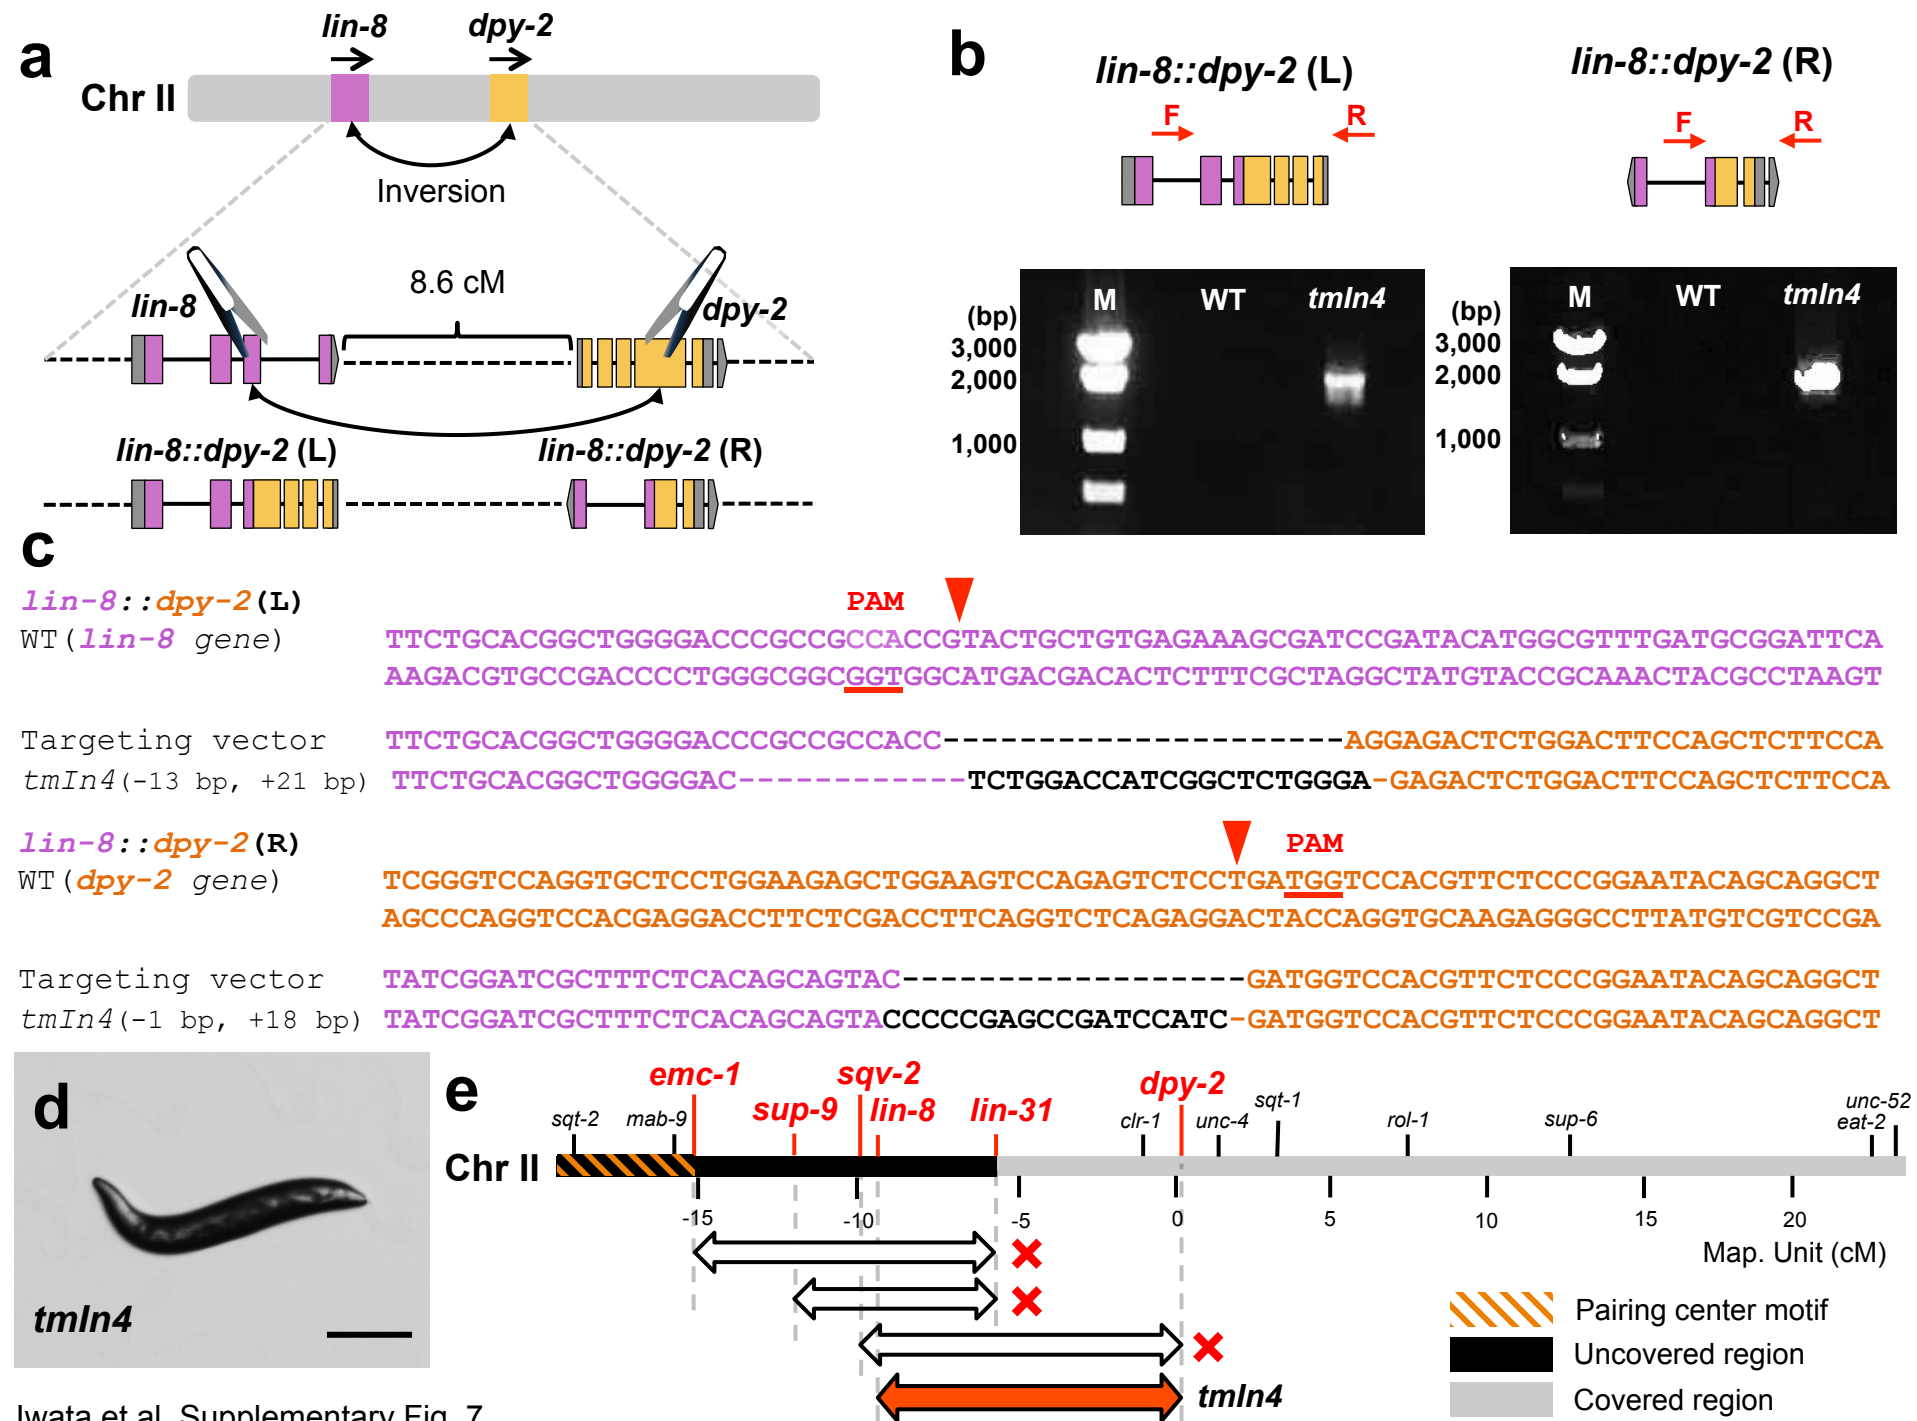

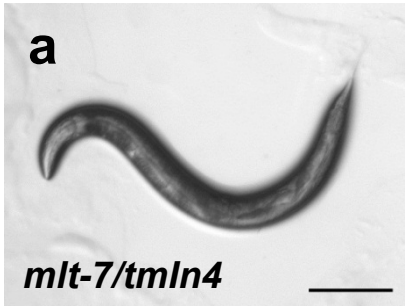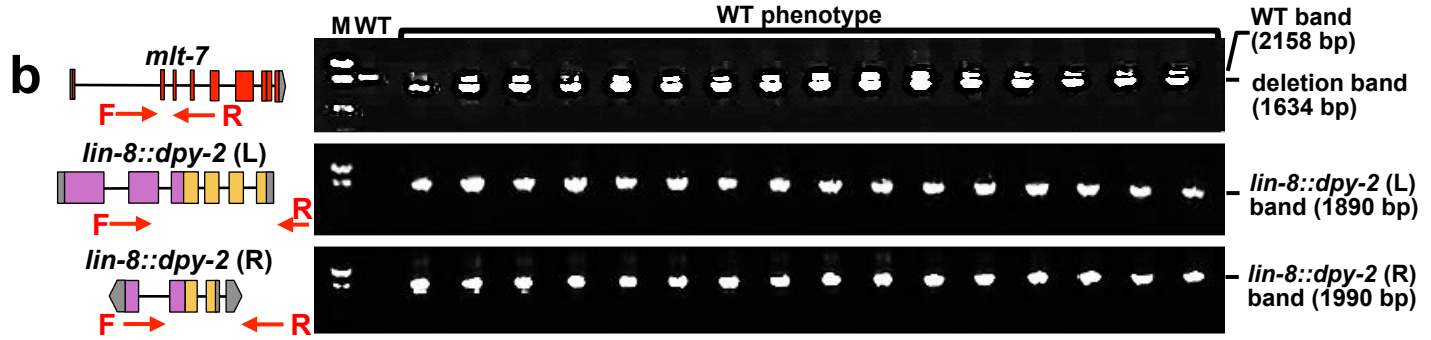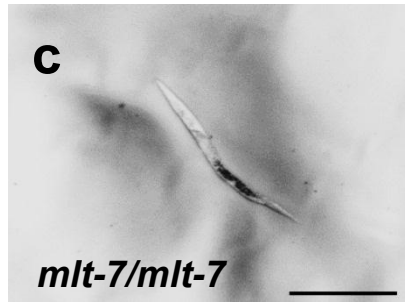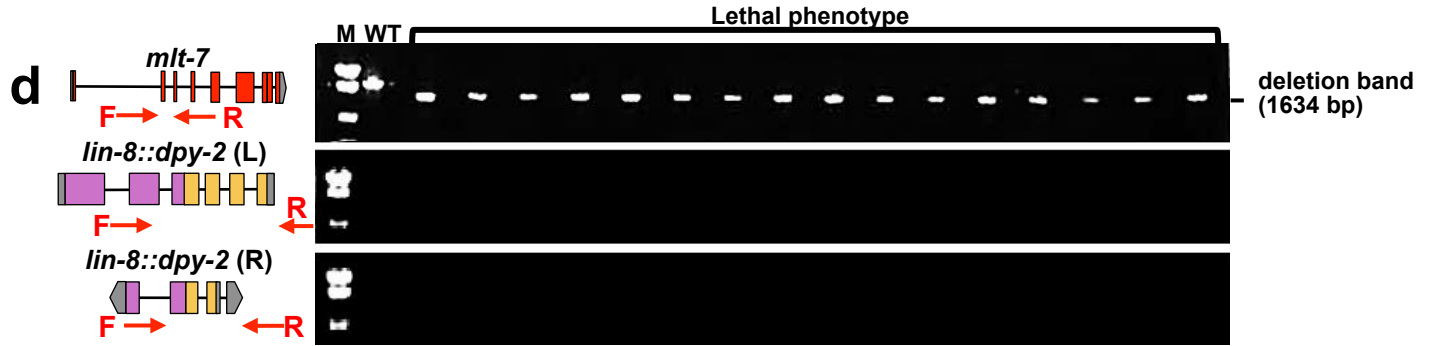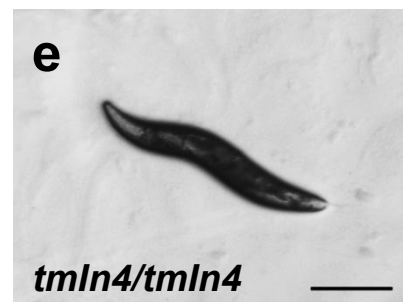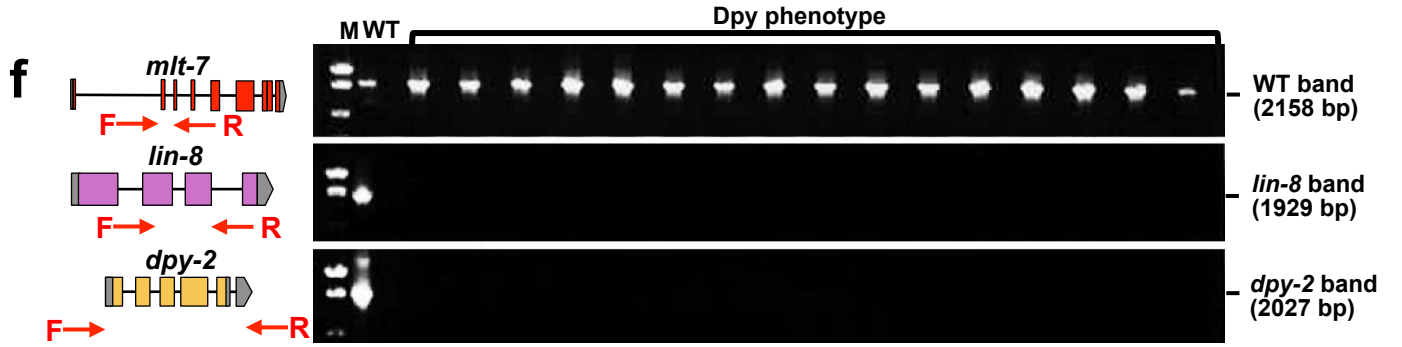

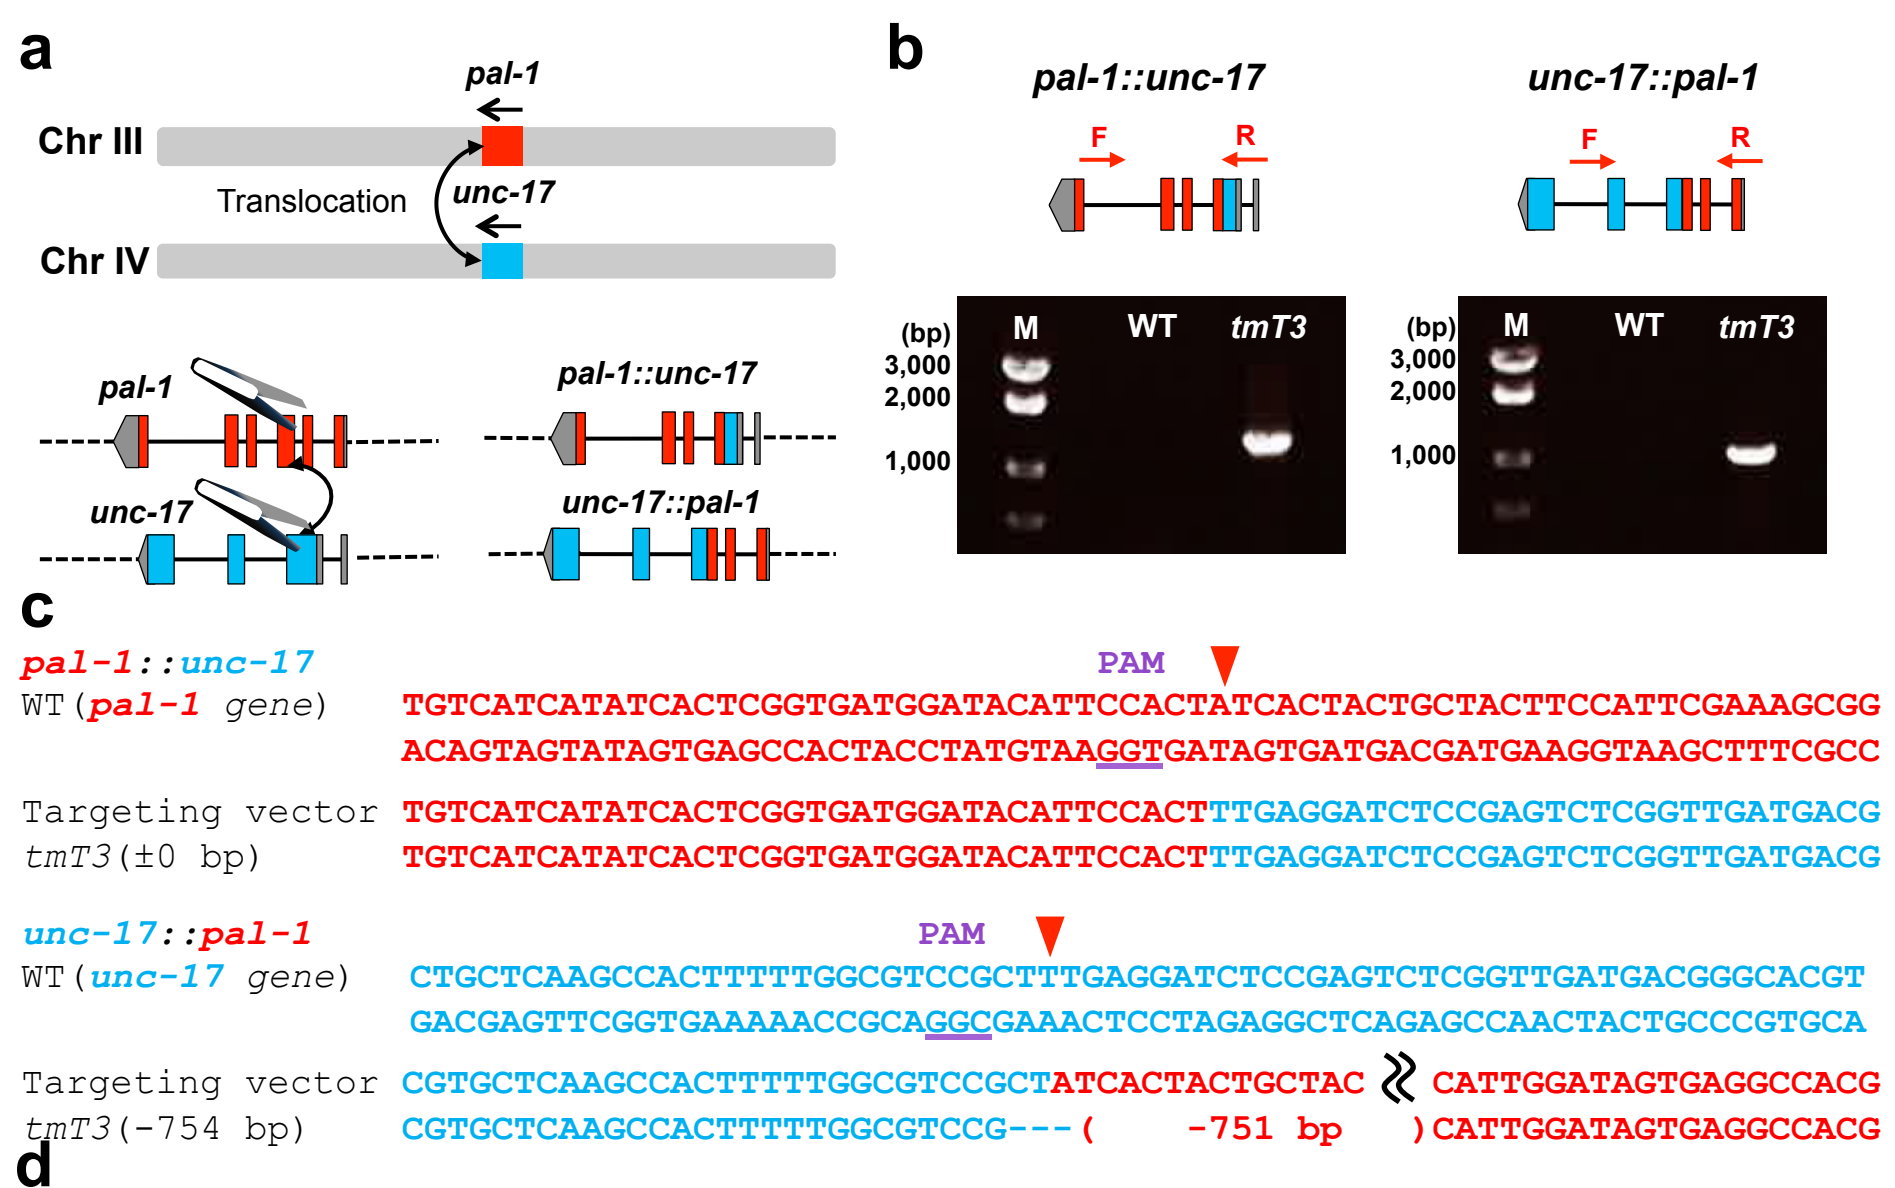

| Balancer name | Cas9 targets                 | Background genotype  | P <sub>0</sub> worms | F <sub>1</sub> worms | Phenotype in F <sub>2</sub> | F <sub>1</sub> PCR | F <sub>2</sub> PCR | Ratio (%) |
|---------------|------------------------------|----------------------|----------------------|----------------------|-----------------------------|--------------------|--------------------|-----------|
| <i>tmT3</i>   | <i>pal-1(III) unc-17(IV)</i> | <i>lig-4 (tm750)</i> | 39                   | 197                  | 48                          | 6                  | 1                  | 0.51      |

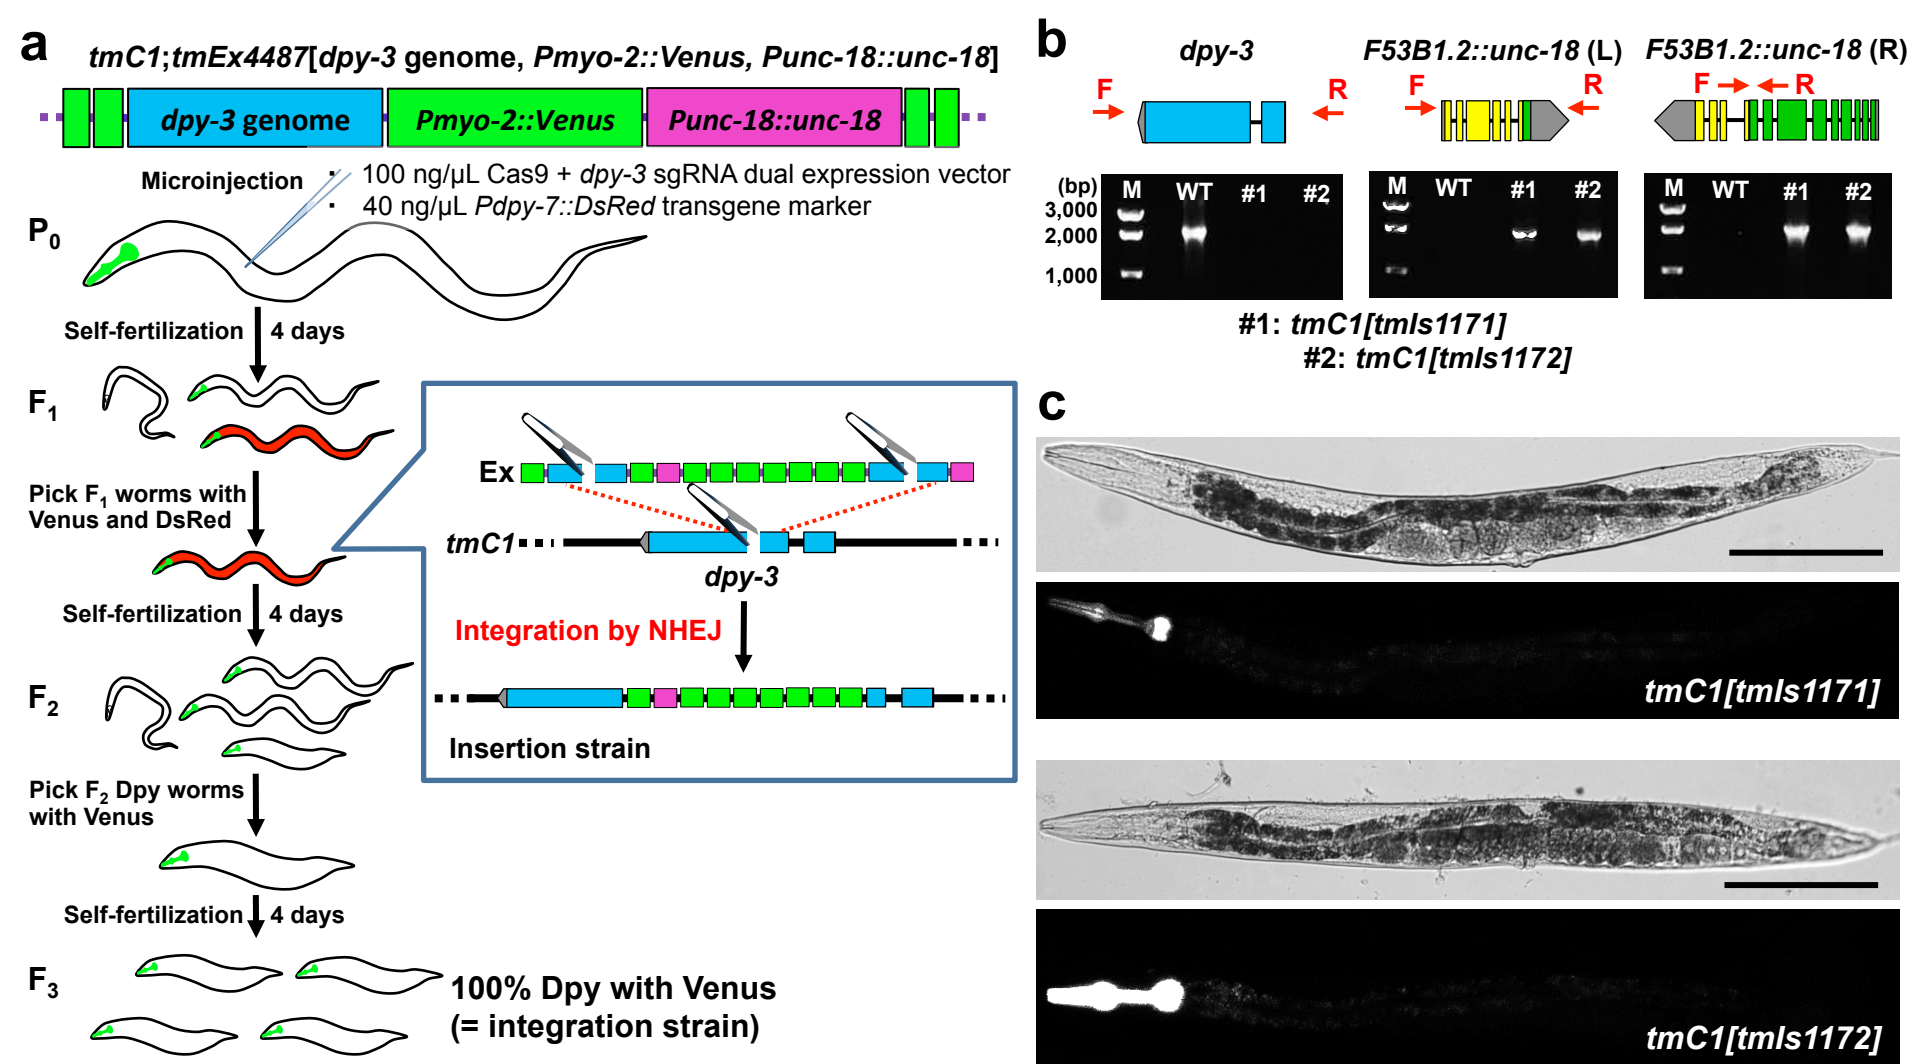

**d**

| Parent strain                                                                                                    | Cas9 target  | P <sub>0</sub> | F <sub>1</sub> (Venus(+)&DsRed(+)) | Producing Dpy | Producing Is | Rate (%) |
|------------------------------------------------------------------------------------------------------------------|--------------|----------------|------------------------------------|---------------|--------------|----------|
| <i>tmC1;tmEx4487</i><br>[ <i>dpy-3</i> genome :<br><i>Pmyo-2::Venus</i> :<br><i>Punc-18::unc-18</i> = 1 : 8 : 1] | <i>dpy-3</i> | 21             | 21                                 | 5             | 2            | 9.5      |

*egl-4::unc-17(L)*

WT (*egl-4* gene)

▼ PAM

CCTGTGAAGATTGTCGACGACTTCCGAGAGGAGTTTGCACAGGTTACTGAAAAATGTGAAGAGGCTAGCGACACTTGGAGTTGGAGGATTTGGA  
GGACACTTCTAACAGCTGCTGAAGGCTCTCCTCAAACGTGTCCAATGTGACTTTTTTACACTTCTCCGATCGCTGTGAACCTCAACCTCCTAAACCT

Predicted sequence

CCTGTGAAGATTGTCGACGACTTCC-----AAGCGGACGCCAAAAAGTGGCTTGAGCA

tmIn42 (WT: -4 bp, +12 bp)

CCTGTGAAGATTGTCGACGACT---GTCGAATCAACC-----AGCGGACGCCAAAAAGTGGCTTGAGCA

tmIn43 (WT: -6 bp)

CCTGTGAAGATTGTCGACGA-----AGCGGACGCCAAAAAGTGGCTTGAGCA

tmIn44 (WT: -2 bp, +43 bp)

CCTGTGAAGATTGTCGACGACTTC-TGTCGACTGTCGACATCTTGTCTGACGACTTCTGTGACTGGG-AGCGGACGCCAAAAAGTGGCTTGAGCA

tmIn45 (*lig-4*: -2 bp, +33 bp)

CCTGTGAAGATTGTCGACGACTTCCGATGGTCCAAACTCGAAAAATCCAAACTGTTG-----GCGGACGCCAAAAAGTGGCTTGAGCA

*egl-4::unc-17(R)*

WT (*unc-17* gene)

PAM ▼

GAGACTATCACCAGGACGCATTTCTTCTGATTATCCTGCTGCTCAAGCCACTTTTTGGCGTCCGCTTTGAGGATCTCCGAGTCTCGGTTGATGACG  
CTCTGATAGTGGTCCGCGTAAAGAAGACTAATAGGACGACGAGTTCGGTGAAAAACCGAGGCCGAACTCCTAGAGGCTCAGAGCCAACTACTGC

Predicted sequence

TTTTTCAGTGTAACCTGTGCAAACCTCCTCTC-----TGAGGATCTCCGAGTCTCGGTTGATGACG

tmIn42 (WT: -1 bp, +14 bp)

TTTTTCAGTGTAACCTGTGCAAACCTCCTCTCGATTTCGACGATGTC-----GAGGATCTCCGAGTCTCGGTTGATGACG

tmIn43 (WT: -6 bp, +1 bp)

TTTTTCAGTGTAACCTGTGCAAACCTC-----A-----GAGGATCTCCGAGTCTCGGTTGATGACG

tmIn44 (WT: -1 bp, +36 bp)

TTTTTCAGTGTAACCTGTGCAAACCTCCTCTCGTCGAGCGTGAAGATTGTGAAGATTGTCGACTTGAC-GAGGATCTCCGAGTCTCGGTTGATGACG

tmIn45 (*lig-4*: -32 bp)

TTTTTCAGTGTAACC-----TCGGTTGATGACG
